# Supplementary material for: Accelerated exploration of efficient ternary solar cells with PTB7:PC71BM:SMPV1 using machine-learning methods
Source: Royal Society of Chemistry journal article supplement (doi:10.1039/d2cp02368g), 2022-01-01
Supplement: d2cp02368g1.pdf [file d2cp02368g1.pdf]

**Dataset: Experimentally Estimated Energy Levels (HOMO(D) and LUMO(D) of Donors, HOMO(A) and LUMO(A) of Acceptors, and HOMO(T) and LUMO(T) of the Third Components) and the Device performance at different doping ratios (T(%), Voc, Jsc, FF, and PCE)**

| HOMO(D) | LUMO(D) | HOMO(A) | LUMO(A) | HOMO(T) | LUMO(T) | T(%) | Voc   | Jsc   | FF   | PCE   | Ref |
|---------|---------|---------|---------|---------|---------|------|-------|-------|------|-------|-----|
| -5.18   | -3.77   | -6      | -4      | -5.15   | -3.1    | 20   | 0.82  | 17.78 | 76.5 | 11.01 | 1   |
| -5.18   | -3.77   | -6      | -4      | -5.15   | -3.1    | 0    | 0.8   | 16.35 | 71.1 | 9.1   | □   |
| -5.18   | -3.77   | -6      | -4      | -5.15   | -3.1    | 10   | 0.81  | 17.16 | 73.3 | 10.03 | □   |
| -5.18   | -3.77   | -6      | -4      | -5.15   | -3.1    | 30   | 0.83  | 17.41 | 71.6 | 10.16 | □   |
| -5.1    | -3.4    | -5.8    | -4.2    | -5.91   | -4.1    | 0    | 0.87  | 15.2  | 64   | 8.4   | 2   |
| -5.1    | -3.4    | -5.8    | -4.2    | -5.91   | -4.1    | 28   | 0.87  | 16.3  | 72   | 10.4  | □   |
| -5.1    | -3.4    | -5.91   | -4.1    | -5.8    | -4.2    | 33   | 0.81  | 14.1  | 60   | 6.9   | 2   |
| -5.1    | -3.4    | -5.91   | -4.1    | -5.8    | -4.2    | 0    | 0.88  | 13.2  | 72   | 8.2   | □   |
| -5.36   | -3.02   | -5.61   | -3.76   | -6.08   | -4.1    | 0    | 1.05  | 14.57 | 58   | 8.92  | 3   |
| -5.36   | -3.02   | -5.61   | -3.76   | -6.08   | -4.1    | 33   | 0.94  | 16.12 | 63   | 9.62  | □   |
| -5.36   | -3.02   | -5.61   | -3.76   | -6.08   | -4.1    | 100  | 0.93  | 10.41 | 57   | 5.59  | □   |
| -5.16   | -2.93   | -5.61   | -3.76   | -6.08   | -4.1    | 0    | 0.88  | 15.19 | 61   | 8.22  | 3   |
| -5.16   | -2.93   | -5.61   | -3.76   | -6.08   | -4.1    | 33   | 0.83  | 16.82 | 65   | 9.16  | □   |
| -5.16   | -2.93   | -5.61   | -3.76   | -6.08   | -4.1    | 100  | 0.79  | 12.85 | 62   | 6.35  | □   |
| -5.15   | -3.55   | -6.09   | -3.9    | -5.52   | -3.51   | 0    | 0.77  | 17.02 | 60.8 | 8     | 4   |
| -5.15   | -3.55   | -6.09   | -3.9    | -5.52   | -3.51   | 5    | 0.77  | 17.24 | 61.6 | 8.2   | □   |
| -5.15   | -3.55   | -6.09   | -3.9    | -5.52   | -3.51   | 10   | 0.77  | 17.54 | 63.3 | 8.5   | □   |
| -5.15   | -3.55   | -6.09   | -3.9    | -5.52   | -3.51   | 15   | 0.768 | 19.15 | 64.2 | 9.4   | □   |
| -5.15   | -3.55   | -6.09   | -3.9    | -5.52   | -3.51   | 20   | 0.77  | 17.34 | 62   | 8.3   | □   |

| HOMO(D) | LUMO(D) | HOMO(A) | LUMO(A) | HOMO(T) | LUMO(T) | T(%) | Voc   | Jsc   | FF    | PCE   | Ref |
|---------|---------|---------|---------|---------|---------|------|-------|-------|-------|-------|-----|
| -5.33   | -2.92   | -5.43   | -3.8    | -5.96   | -3.98   | 0    | 0.87  | 18.42 | 62.3  | 9.93  | 5   |
| -5.33   | -2.92   | -5.43   | -3.8    | -5.96   | -3.98   | 17   | 0.86  | 20.5  | 63.6  | 11.16 | □   |
| -5.33   | -2.92   | -5.43   | -3.8    | -5.96   | -3.98   | 33   | 0.86  | 20.61 | 63.4  | 11.17 | □   |
| -5.33   | -2.92   | -5.43   | -3.8    | -5.96   | -3.98   | 50   | 0.88  | 20.84 | 66.7  | 12.07 | □   |
| -5.33   | -2.92   | -5.96   | -3.98   | -5.43   | -3.8    | 0    | 0.83  | 13.33 | 69.08 | 7.63  | 5   |
| -5.33   | -2.92   | -5.96   | -3.98   | -5.43   | -3.8    | 17   | 0.85  | 17.96 | 68    | 10.35 | □   |
| -5.33   | -2.92   | -5.96   | -3.98   | -5.43   | -3.8    | 33   | 0.87  | 19.57 | 67    | 11.35 | □   |
| -5.3    | -2.9    | -5.5    | -3.8    | -6      | -4      | 0    | 0.902 | 15.06 | 69    | 9.38  | 6   |
| -5.3    | -2.9    | -5.5    | -3.8    | -6      | -4      | 20   | 0.892 | 15.98 | 71.7  | 10.22 | □   |
| -5.3    | -2.9    | -5.5    | -3.8    | -6      | -4      | 100  | 0.856 | 13.64 | 70.3  | 8.21  | □   |
| -5.47   | -3.83   | -6.07   | -4.03   | -5.64   | -3.98   | 0    | 0.76  | 5.87  | 53.8  | 2.4   | 7   |
| -5.47   | -3.83   | -6.07   | -4.03   | -5.64   | -3.98   | 25   | 0.76  | 17.54 | 65.5  | 8.72  | □   |
| -5.47   | -3.83   | -6.07   | -4.03   | -5.64   | -3.98   | 37.5 | 0.75  | 21.12 | 63.9  | 10.17 | □   |
| -5.47   | -3.83   | -6.07   | -4.03   | -5.64   | -3.98   | 50   | 0.76  | 19.76 | 64.3  | 9.53  | □   |
| -5.47   | -3.83   | -5.64   | -3.98   | -6.07   | -4.03   | 0    | 0.79  | 13.56 | 65.1  | 6.97  | 7   |
| -5.47   | -3.83   | -5.64   | -3.98   | -6.07   | -4.03   | 25   | 0.77  | 17.59 | 66.3  | 8.98  | □   |
| -5.47   | -3.83   | -5.64   | -3.98   | -6.07   | -4.03   | 37.5 | 0.77  | 17.8  | 68.2  | 9.27  | □   |
| -5.51   | -3.62   | -5.66   | -4.09   | -6      | -4      | 0    | 0.838 | 26.19 | 75.84 | 16.65 | 8   |
| -5.51   | -3.62   | -5.66   | -4.09   | -6      | -4      | 8    | 0.847 | 26.44 | 77.65 | 17.39 | □   |
| -5.51   | -3.62   | -5.66   | -4.09   | -6      | -4      | 50   | 0.847 | 23.47 | 73.18 | 14.56 | □   |
| -5.51   | -3.62   | -5.66   | -4.09   | -6      | -4      | 100  | 0.911 | 12.5  | 73.22 | 8.34  | □   |

| HOMO(D) | LUMO(D) | HOMO(A) | LUMO(A) | HOMO(T) | LUMO(T) | T(%) | Voc   | Jsc   | FF    | PCE   | Ref |
|---------|---------|---------|---------|---------|---------|------|-------|-------|-------|-------|-----|
| -5.54   | -3.65   | -5.65   | -4.1    | -5.87   | -3.91   | 0    | 0.83  | 25.12 | 74.53 | 15.56 | 9   |
| -5.54   | -3.65   | -5.65   | -4.1    | -5.87   | -3.91   | 8    | 0.837 | 26.12 | 76.5  | 16.72 | □   |
| -5.45   | -3.69   | -6      | -4.1    | -5.52   | -3.87   | 0    | 0.79  | 14.75 | 70    | 8.16  | 10  |
| -5.45   | -3.69   | -6      | -4.1    | -5.52   | -3.87   | 10   | 0.82  | 15.5  | 71    | 9.02  | □   |
| -5.45   | -3.69   | -6      | -4.1    | -5.52   | -3.87   | 20   | 0.84  | 14.88 | 69    | 8.62  | □   |
| -5.45   | -3.69   | -6      | -4.1    | -5.52   | -3.87   | 40   | 0.88  | 13.68 | 60    | 7.22  | □   |
| -5.45   | -3.69   | -6      | -4.1    | -5.52   | -3.87   | 60   | 0.91  | 10.23 | 42    | 3.91  | □   |
| -5.45   | -3.69   | -6      | -4.1    | -5.52   | -3.87   | 80   | 0.98  | 7.71  | 39    | 2.95  | □   |
| -5.45   | -3.69   | -6      | -4.1    | -5.52   | -3.87   | 100  | 1.11  | 8.4   | 55    | 5.16  | □   |
| -5.51   | -3.31   | -5.9    | -3.86   | -5.23   | -3.78   | 0    | 0.75  | 15.51 | 68.53 | 7.97  | 11  |
| -5.51   | -3.31   | -5.9    | -3.86   | -5.23   | -3.78   | 5    | 0.74  | 16.47 | 68.99 | 8.41  | □   |
| -5.51   | -3.31   | -5.9    | -3.86   | -5.23   | -3.78   | 10   | 0.74  | 16.48 | 70.75 | 8.63  | □   |
| -5.51   | -3.31   | -5.9    | -3.86   | -5.23   | -3.78   | 15   | 0.74  | 17.55 | 70.92 | 9.21  | □   |
| -5.51   | -3.31   | -5.9    | -3.86   | -5.23   | -3.78   | 30   | 0.74  | 15.94 | 65.55 | 7.73  | □   |
| -5.51   | -3.31   | -5.9    | -3.86   | -5.23   | -3.78   | 50   | 0.73  | 15.13 | 62.64 | 6.92  | □   |
| -5.51   | -3.31   | -5.9    | -3.86   | -5.14   | -3.52   | 0    | 0.75  | 15.51 | 68.53 | 7.97  | 11  |
| -5.51   | -3.31   | -5.9    | -3.86   | -5.14   | -3.52   | 5    | 0.75  | 16.57 | 70.68 | 8.78  | □   |
| -5.51   | -3.31   | -5.9    | -3.86   | -5.14   | -3.52   | 10   | 0.74  | 17.04 | 70.17 | 8.85  | □   |
| -5.51   | -3.31   | -5.9    | -3.86   | -5.14   | -3.52   | 15   | 0.75  | 15.99 | 69.77 | 8.26  | □   |
| -5.51   | -3.31   | -5.9    | -3.86   | -5.14   | -3.52   | 30   | 0.76  | 15.17 | 69.76 | 8.04  | □   |
| -5.51   | -3.31   | -5.9    | -3.86   | -5.14   | -3.52   | 50   | 0.76  | 14.21 | 62.71 | 6.77  | □   |

| HOMO(D) | LUMO(D) | HOMO(A) | LUMO(A) | HOMO(T) | LUMO(T) | T(%) | Voc   | Jsc   | FF    | PCE   | Ref |
|---------|---------|---------|---------|---------|---------|------|-------|-------|-------|-------|-----|
| -5.24   | -3.62   | -6.1    | -3.9    | -5.54   | -2.8    | 0    | 0.78  | 17.72 | 65.29 | 8.98  | 12  |
| -5.24   | -3.62   | -6.1    | -3.9    | -5.54   | -2.8    | 5    | 0.78  | 18.02 | 67.51 | 9.59  | □   |
| -5.24   | -3.62   | -6.1    | -3.9    | -5.54   | -2.8    | 10   | 0.79  | 20.01 | 68.07 | 10.56 | □   |
| -5.24   | -3.62   | -6.1    | -3.9    | -5.54   | -2.8    | 15   | 0.79  | 18.53 | 66.71 | 9.62  | □   |
| -5.24   | -3.62   | -6.1    | -3.9    | -5.54   | -2.8    | 20   | 0.79  | 17.51 | 66.69 | 9.06  | □   |
| -5.15   | -3.31   | -6.1    | -3.9    | -5.54   | -2.8    | 0    | 0.72  | 16.09 | 68.01 | 7.92  | 12  |
| -5.15   | -3.31   | -6.1    | -3.9    | -5.54   | -2.8    | 5    | 0.72  | 16.67 | 71.22 | 8.59  | □   |
| -5.15   | -3.31   | -6.1    | -3.9    | -5.54   | -2.8    | 10   | 0.73  | 17.7  | 72.64 | 9.42  | □   |
| -5.15   | -3.31   | -6.1    | -3.9    | -5.54   | -2.8    | 15   | 0.73  | 15.94 | 71.55 | 8.37  | □   |
| -5.15   | -3.31   | -6.1    | -3.9    | -5.54   | -2.8    | 20   | 0.73  | 15.4  | 69.31 | 7.84  | □   |
| -5.39   | -3.12   | -5.5    | -3.88   | -5.55   | -3.67   | 0    | 0.701 | 22.32 | 60    | 9.39  | 13  |
| -5.39   | -3.12   | -5.5    | -3.88   | -5.55   | -3.67   | 30   | 0.711 | 25.13 | 68    | 12.06 | □   |
| -5.39   | -3.12   | -5.5    | -3.88   | -5.55   | -3.67   | 100  | 0.819 | 15.26 | 62    | 7.74  | □   |
| -5.45   | -3.26   | -5.15   | -4.1    | -5.96   | -4      | 0    | 0.849 | 22.43 | 55.82 | 10.58 | 14  |
| -5.45   | -3.26   | -5.15   | -4.1    | -5.96   | -4      | 17   | 0.86  | 24.64 | 62.04 | 13.15 | □   |
| -5.45   | -3.26   | -5.15   | -4.1    | -5.96   | -4      | 100  | 0.913 | 12.16 | 59.55 | 6.58  | □   |
| -5.54   | -2.98   | -5.65   | -4.1    | -6      | -4      | 0    | 0.851 | 24.64 | 71.67 | 15.03 | 15  |
| -5.54   | -2.98   | -5.65   | -4.1    | -6      | -4      | 14   | 0.85  | 25.32 | 74.69 | 16.07 | □   |
| -5.54   | -2.98   | -5.65   | -4.1    | -6      | -4      | 25   | 0.847 | 25.12 | 71    | 15.11 | □   |
| -5.54   | -2.98   | -5.65   | -4.1    | -6      | -4      | 100  | 0.94  | 8.32  | 55.12 | 4.31  | □   |
| -5.24   | -3.62   | -6.1    | -3.7    | -5.13   | -2.8    | 0    | 0.78  | 18.26 | 65.49 | 9.26  | 16  |

| HOMO(D) | LUMO(D) | HOMO(A) | LUMO(A) | HOMO(T) | LUMO(T) | T(%) | Voc   | Jsc   | FF    | PCE   | Ref |
|---------|---------|---------|---------|---------|---------|------|-------|-------|-------|-------|-----|
| -5.24   | -3.62   | -6.1    | -3.7    | -5.13   | -2.8    | 5    | 0.78  | 18.61 | 69.74 | 10.08 | □   |
| -5.24   | -3.62   | -6.1    | -3.7    | -5.13   | -2.8    | 10   | 0.78  | 22.26 | 70.71 | 12.23 | □   |
| -5.24   | -3.62   | -6.1    | -3.7    | -5.13   | -2.8    | 15   | 0.77  | 20.88 | 70.29 | 11.25 | □   |
| -5.24   | -3.62   | -6.1    | -3.7    | -5.13   | -2.8    | 20   | 0.76  | 18.93 | 66.63 | 9.81  | □   |
| -5.25   | -3.2    | -6      | -4      | -5.38   | -2.83   | 0    | 0.79  | 18.2  | 71.4  | 10.31 | 17  |
| -5.25   | -3.2    | -6      | -4      | -5.38   | -2.83   | 5    | 0.78  | 18.3  | 73.7  | 10.6  | □   |
| -5.25   | -3.2    | -6      | -4      | -5.38   | -2.83   | 10   | 0.78  | 18.6  | 75.7  | 11    | □   |
| -5.25   | -3.2    | -6      | -4      | -5.38   | -2.83   | 15   | 0.78  | 18.5  | 74.8  | 10.86 | □   |
| -5.25   | -3.2    | -6      | -4      | -5.38   | -2.83   | 20   | 0.77  | 18.4  | 73.9  | 10.59 | □   |
| -5.23   | -3.65   | -6      | -4.1    | -5.21   | -3.41   | 0    | 0.795 | 16.51 | 63.06 | 8.28  | 18  |
| -5.23   | -3.65   | -6      | -4.1    | -5.21   | -3.41   | 5    | 0.795 | 16.92 | 64    | 8.62  | □   |
| -5.23   | -3.65   | -6      | -4.1    | -5.21   | -3.41   | 10   | 0.801 | 17.36 | 65.21 | 9.11  | □   |
| -5.23   | -3.65   | -6      | -4.1    | -5.21   | -3.41   | 15   | 0.806 | 17.6  | 65.62 | 9.3   | □   |
| -5.23   | -3.65   | -6      | -4.1    | -5.21   | -3.41   | 20   | 0.79  | 16.83 | 66.23 | 8.83  | □   |
| -5.23   | -3.65   | -6      | -4.1    | -5.21   | -3.41   | 25   | 0.795 | 16.31 | 62.11 | 7.92  | □   |
| -5.32   | -3.48   | -5.65   | -4.1    | -5.96   | -4      | 0    | 0.79  | 22.86 | 69.37 | 12.55 | 19  |
| -5.32   | -3.48   | -5.65   | -4.1    | -5.96   | -4      | 14   | 0.811 | 24.66 | 74.39 | 14.88 | □   |
| -5.32   | -3.48   | -5.65   | -4.1    | -5.96   | -4      | 100  | 0.912 | 11.66 | 66.26 | 7.05  | □   |
| -5.34   | -3.69   | -6      | -4      | -5.75   | -3.7    | 0    | 0.789 | 14.97 | 59.3  | 7.37  | 20  |
| -5.34   | -3.69   | -6      | -4      | -5.75   | -3.7    | 3    | 0.794 | 16.49 | 61.1  | 8.17  | □   |
| -5.34   | -3.69   | -6      | -4      | -5.75   | -3.7    | 5    | 0.795 | 16.61 | 62.5  | 8.51  | □   |

| HOMO(D) | LUMO(D) | HOMO(A) | LUMO(A) | HOMO(T) | LUMO(T) | T(%) | Voc   | Jsc   | FF    | PCE   | Ref |
|---------|---------|---------|---------|---------|---------|------|-------|-------|-------|-------|-----|
| -5.34   | -3.69   | -6      | -4      | -5.75   | -3.7    | 10   | 0.801 | 14.01 | 55.1  | 6.83  | □   |
| -5.34   | -3.69   | -6      | -4      | -5.75   | -3.7    | 100  | 1.136 | 4     | 44.5  | 2.13  | □   |
| -5.56   | -3.67   | -6      | -4.15   | -5.64   | -4.04   | 0    | 0.83  | 13.3  | 58.5  | 6.74  | 21  |
| -5.56   | -3.67   | -6      | -4.15   | -5.64   | -4.04   | 10   | 0.86  | 13.9  | 63.6  | 7.92  | □   |
| -5.56   | -3.67   | -6      | -4.15   | -5.64   | -4.04   | 20   | 0.87  | 14.8  | 63    | 8.18  | □   |
| -5.56   | -3.67   | -6      | -4.15   | -5.64   | -4.04   | 30   | 0.87  | 14.5  | 55.5  | 7.24  | □   |
| -5.56   | -3.67   | -6      | -4.15   | -5.64   | -4.04   | 40   | 0.88  | 11.5  | 53.3  | 5.6   | □   |
| -5.56   | -3.67   | -6      | -4.15   | -5.64   | -4.04   | 50   | 0.89  | 8.28  | 42.1  | 3.31  | □   |
| -5.56   | -3.67   | -6      | -4.15   | -5.64   | -4.04   | 100  | 0.97  | 10.27 | 51    | 5.43  | □   |
| -5.1    | -3.3    | -6.1    | -4.3    | -5.51   | -3.91   | 0    | 0.796 | 16.73 | 63.81 | 8.5   | 22  |
| -5.1    | -3.3    | -6.1    | -4.3    | -5.51   | -3.91   | 5    | 0.808 | 17.08 | 66.95 | 9.24  | □   |
| -5.1    | -3.3    | -6.1    | -4.3    | -5.51   | -3.91   | 10   | 0.814 | 17.56 | 67.51 | 9.65  | □   |
| -5.1    | -3.3    | -6.1    | -4.3    | -5.51   | -3.91   | 15   | 0.82  | 17.82 | 67.54 | 9.87  | □   |
| -5.1    | -3.3    | -6.1    | -4.3    | -5.51   | -3.91   | 20   | 0.826 | 17.62 | 63.94 | 9.31  | □   |
| -5.1    | -3.3    | -6.1    | -4.3    | -5.51   | -3.91   | 25   | 0.832 | 17.29 | 60.55 | 8.71  | □   |
| -5.36   | -3.39   | -6.11   | -4.3    | -5.49   | -3.45   | 0    | 0.93  | 13.95 | 69.6  | 9.05  | 23  |
| -5.36   | -3.39   | -6.11   | -4.3    | -5.49   | -3.45   | 20   | 0.93  | 14.62 | 74.2  | 10.14 | □   |
| -5.36   | -3.39   | -6.11   | -4.3    | -5.49   | -3.45   | 100  | 0.9   | 13.56 | 65.3  | 8     | □   |
| -5.41   | -3.53   | -5.97   | -3.98   | -5.52   | -3.7    | 0    | 0.8   | 12.13 | 54.99 | 5.34  | 24  |
| -5.41   | -3.53   | -5.97   | -3.98   | -5.52   | -3.7    | 5    | 0.83  | 11.76 | 58.89 | 5.75  | □   |
| -5.41   | -3.53   | -5.97   | -3.98   | -5.52   | -3.7    | 10   | 0.82  | 11.62 | 62.54 | 5.96  | □   |

| HOMO(D) | LUMO(D) | HOMO(A) | LUMO(A) | HOMO(T) | LUMO(T) | T(%) | Voc   | Jsc   | FF    | PCE   | Ref |
|---------|---------|---------|---------|---------|---------|------|-------|-------|-------|-------|-----|
| -5.41   | -3.53   | -5.97   | -3.98   | -5.52   | -3.7    | 15   | 0.83  | 12.57 | 62.93 | 6.56  | □   |
| -5.41   | -3.53   | -5.97   | -3.98   | -5.52   | -3.7    | 20   | 0.82  | 10.22 | 65.72 | 5.51  | □   |
| -5.41   | -3.53   | -5.97   | -3.98   | -5.52   | -3.7    | 30   | 0.84  | 9.35  | 66.05 | 5.19  | □   |
| -5.42   | -3.41   | -5.67   | -4.02   | -5.92   | -3.9    | 0    | 0.879 | 17.28 | 72.7  | 11.04 | 25  |
| -5.42   | -3.41   | -5.67   | -4.02   | -5.92   | -3.9    | 9    | 0.882 | 17.74 | 75.7  | 11.84 | □   |
| -5.42   | -3.41   | -5.67   | -4.02   | -5.92   | -3.9    | 17   | 0.892 | 18.19 | 75.1  | 12.19 | □   |
| -5.42   | -3.41   | -5.67   | -4.02   | -5.92   | -3.9    | 23   | 0.893 | 18.1  | 74.1  | 11.98 | □   |
| -5.42   | -3.41   | -5.67   | -4.02   | -5.92   | -3.9    | 29   | 0.901 | 17.76 | 73.2  | 11.71 | □   |
| -5.42   | -3.41   | -5.67   | -4.02   | -5.92   | -3.9    | 38   | 0.898 | 17.69 | 73.5  | 11.67 | □   |
| -5.42   | -3.41   | -5.67   | -4.02   | -5.92   | -3.9    | 50   | 0.893 | 17.64 | 71.3  | 11.23 | □   |
| -5.42   | -3.41   | -5.67   | -4.02   | -5.92   | -3.9    | 100  | 0.914 | 12.28 | 78    | 8.75  | □   |
| -5.35   | -3.62   | -5.65   | -3.96   | -6.1    | -4.1    | 0    | 0.97  | 19.54 | 59    | 11.18 | 26  |
| -5.35   | -3.62   | -5.65   | -3.96   | -6.1    | -4.1    | 25   | 0.89  | 21.91 | 68    | 13.26 | □   |
| -5.35   | -3.62   | -5.65   | -3.96   | -6.1    | -4.1    | 100  | 0.84  | 12.5  | 63    | 6.62  | □   |
| -5.42   | -3.61   | -5.61   | -4.08   | -5.82   | -3.94   | 0    | 0.851 | 20.62 | 74.7  | 13.11 | 27  |
| -5.42   | -3.61   | -5.61   | -4.08   | -5.82   | -3.94   | 9    | 0.849 | 21.48 | 75.29 | 13.73 | □   |
| -5.42   | -3.61   | -5.64   | -4.1    | -5.82   | -3.94   | 0    | 0.865 | 25.26 | 71.4  | 15.6  | 27  |
| -5.42   | -3.61   | -5.64   | -4.1    | -5.82   | -3.94   | 9    | 0.866 | 25.57 | 73.84 | 16.35 | □   |
| -5.22   | -3.64   | -6      | -4      | -5.36   | -3.55   | 0    | 0.78  | 17.5  | 66    | 9.2   | 28  |
| -5.22   | -3.64   | -6      | -4      | -5.36   | -3.55   | 10   | 0.79  | 19.14 | 67.7  | 10.4  | □   |
| -5.22   | -3.64   | -6      | -4      | -5.36   | -3.55   | 100  | 0.8   | 4.33  | 37.1  | 1.3   | □   |

| HOMO(D) | LUMO(D) | HOMO(A) | LUMO(A) | HOMO(T) | LUMO(T) | T(%) | Voc   | Jsc   | FF    | PCE   | Ref |
|---------|---------|---------|---------|---------|---------|------|-------|-------|-------|-------|-----|
| -5.22   | -3.64   | -6      | -4      | -5.47   | -3.52   | 0    | 0.78  | 17.5  | 66    | 9.2   | 28  |
| -5.22   | -3.64   | -6      | -4      | -5.47   | -3.52   | 10   | 0.8   | 18.03 | 64.7  | 9.4   | □   |
| -5.22   | -3.64   | -6      | -4      | -5.47   | -3.52   | 100  | 0.83  | 9.81  | 42.4  | 3.8   | □   |
| -5.22   | -3.64   | -6      | -4      | -5.41   | -3.54   | 0    | 0.78  | 17.5  | 66    | 9.2   | 28  |
| -5.22   | -3.64   | -6      | -4      | -5.41   | -3.54   | 10   | 0.78  | 17.75 | 67.5  | 9.6   | □   |
| -5.22   | -3.64   | -6      | -4      | -5.41   | -3.54   | 100  | 0.79  | 10.36 | 51.3  | 4.4   | □   |
| -5.29   | -3.67   | -6      | -4      | -5.24   | -3.55   | 0    | 0.92  | 11.25 | 39    | 4.03  | 29  |
| -5.29   | -3.67   | -6      | -4      | -5.24   | -3.55   | 20   | 0.89  | 13.02 | 58    | 6.72  | □   |
| -5.07   | -3.3    | -5.65   | -4.1    | -6      | -4      | 0    | 0.879 | 21.67 | 55.21 | 10.53 | 30  |
| -5.07   | -3.3    | -5.65   | -4.1    | -6      | -4      | 10   | 0.875 | 23    | 58.09 | 11.62 | □   |
| -5.07   | -3.3    | -5.65   | -4.1    | -6      | -4      | 30   | 0.87  | 22.47 | 64.72 | 12.65 | □   |
| -5.07   | -3.3    | -5.65   | -4.1    | -6      | -4      | 40   | 0.858 | 22.19 | 67.27 | 12.84 | □   |
| -5.07   | -3.3    | -5.65   | -4.1    | -6      | -4      | 50   | 0.852 | 21.43 | 69.19 | 12.6  | □   |
| -5.07   | -3.3    | -5.65   | -4.1    | -6      | -4      | 70   | 0.849 | 18.4  | 67.11 | 10.5  | □   |
| -5.07   | -3.3    | -5.65   | -4.1    | -6      | -4      | 100  | 0.936 | 12.04 | 65.39 | 7.4   | □   |
| -5.24   | -3.36   | -5.44   | -4.19   | -5.96   | -3.98   | 0    | 0.73  | 21.3  | 60    | 9.44  | 31  |
| -5.24   | -3.36   | -5.44   | -4.19   | -5.96   | -3.98   | 10   | 0.74  | 22.64 | 63    | 10.55 | □   |
| -5.24   | -3.36   | -5.44   | -4.19   | -5.96   | -3.98   | 20   | 0.74  | 23.14 | 60    | 10.23 | □   |
| -5.24   | -3.36   | -5.44   | -4.19   | -5.96   | -3.98   | 30   | 0.74  | 21.9  | 58    | 9.36  | □   |
| -5.24   | -3.36   | -5.44   | -4.19   | -5.96   | -3.98   | 50   | 0.76  | 20.91 | 51    | 8.04  | □   |
| -5.3    | -3.9    | -5.67   | -4.14   | -6.1    | -4.1    | 0    | 0.84  | 21.94 | 63    | 11.61 | 32  |



| HOMO(D) | LUMO(D) | HOMO(A) | LUMO(A) | HOMO(T) | LUMO(T) | T(%) | Voc   | Jsc   | FF    | PCE   | Ref |
|---------|---------|---------|---------|---------|---------|------|-------|-------|-------|-------|-----|
| -5.3    | -3.9    | -5.67   | -4.14   | -6.1    | -4.1    | 25   | 0.87  | 23.74 | 73    | 15.08 | □   |
| -5.3    | -3.9    | -5.67   | -4.14   | -6.1    | -4.1    | 100  | 0.89  | 15.98 | 66    | 9.39  | □   |
| -5.5    | -3.6    | -5.9    | -3.9    | -5.5    | -3.8    | 0    | 0.875 | 12.02 | 58.1  | 6.11  | 33  |
| -5.5    | -3.6    | -5.9    | -3.9    | -5.5    | -3.8    | 20   | 0.906 | 12.5  | 54.9  | 6.21  | □   |
| -5.5    | -3.6    | -5.9    | -3.9    | -5.5    | -3.8    | 25   | 0.907 | 11.73 | 49.4  | 5.25  | □   |
| -5.22   | -3.64   | -5.65   | -4.1    | -5.96   | -3.98   | 0    | 0.67  | 20.16 | 56.77 | 7.71  | 34  |
| -5.22   | -3.64   | -5.65   | -4.1    | -5.96   | -3.98   | 17   | 0.67  | 24.68 | 58.02 | 9.55  | □   |
| -5.22   | -3.64   | -5.65   | -4.1    | -5.96   | -3.98   | 100  | 0.82  | 13.92 | 58.8  | 6.67  | □   |
| -5.36   | -3.5    | -6.02   | -4.15   | -5.5    | -3.9    | 0    | 0.869 | 12.4  | 71.4  | 7.72  | 35  |
| -5.36   | -3.5    | -6.02   | -4.15   | -5.5    | -3.9    | 17   | 0.929 | 13    | 74.9  | 9.08  | □   |
| -5.5    | -3.56   | -5.7    | -4.1    | -5.92   | -3.9    | 0    | 0.845 | 24.89 | 74.37 | 15.75 | 36  |
| -5.5    | -3.56   | -5.7    | -4.1    | -5.92   | -3.9    | 8    | 0.85  | 25.36 | 75.66 | 16.3  | □   |
| -5.5    | -3.56   | -5.7    | -4.1    | -5.92   | -3.9    | 12.5 | 0.85  | 25.8  | 74.66 | 16.38 | □   |
| -5.5    | -3.56   | -5.7    | -4.1    | -5.92   | -3.9    | 17   | 0.85  | 25.7  | 76.35 | 16.67 | □   |
| -5.5    | -3.56   | -5.7    | -4.1    | -5.92   | -3.9    | 25   | 0.853 | 25.05 | 75.15 | 16.05 | □   |
| -5.5    | -3.56   | -5.7    | -4.1    | -5.92   | -3.9    | 42   | 0.865 | 23.94 | 73.85 | 15.3  | □   |
| -5.5    | -3.56   | -5.7    | -4.1    | -5.92   | -3.9    | 67   | 0.876 | 19.24 | 49.74 | 8.39  | □   |
| -5.5    | -3.56   | -5.7    | -4.1    | -5.92   | -3.9    | 100  | 0.965 | 11.56 | 53.9  | 6.01  | □   |
| -4.9    | -3      | -6      | -4      | -5      | -3.4    | 0    | 0.59  | 8.45  | 65    | 3.23  | 37  |
| -4.9    | -3      | -6      | -4      | -5      | -3.4    | 20   | 0.61  | 11.88 | 56.7  | 4.11  | □   |
| -4.9    | -3      | -6      | -4      | -5      | -3.4    | 100  | 0.8   | 2.45  | 57.7  | 1.14  | □   |

| HOMO(D) | LUMO(D) | HOMO(A) | LUMO(A) | HOMO(T) | LUMO(T) | T(%) | Voc   | Jsc   | FF    | PCE   | Ref |
|---------|---------|---------|---------|---------|---------|------|-------|-------|-------|-------|-----|
| -5.33   | -3.43   | -5.71   | -4.18   | -6      | -4.12   | 0    | 0.89  | 19.91 | 72    | 12.81 | 38  |
| -5.33   | -3.43   | -5.71   | -4.18   | -6      | -4.12   | 15   | 0.9   | 20.82 | 73    | 13.67 | □   |
| -5.33   | -3.43   | -5.65   | -4.29   | -6      | -4.12   | 0    | 0.84  | 24.99 | 72    | 15.05 | 38  |
| -5.33   | -3.43   | -5.65   | -4.29   | -6      | -4.12   | 15   | 0.85  | 25.96 | 74    | 16.43 | □   |
| -5.47   | -3.67   | -5.56   | -4.03   | -6      | -3.9    | 0    | 0.9   | 19.49 | 69.73 | 12.23 | 39  |
| -5.47   | -3.67   | -5.56   | -4.03   | -6      | -3.9    | 33   | 0.92  | 19.86 | 73.2  | 13.37 | □   |
| -5.47   | -3.67   | -5.56   | -4.03   | -6      | -3.9    | 50   | 0.92  | 18.48 | 72.71 | 12.36 | □   |
| -5.47   | -3.67   | -5.56   | -4.03   | -6      | -3.9    | 60   | 0.92  | 17.83 | 71.48 | 11.72 | □   |
| -5.36   | -3.54   | -5.42   | -4      | -6      | -3.9    | 0    | 0.9   | 21.87 | 58.7  | 11.55 | 40  |
| -5.36   | -3.54   | -5.42   | -4      | -6      | -3.9    | 33   | 0.88  | 23.7  | 64.2  | 13.38 | □   |
| -5.36   | -3.54   | -5.42   | -4      | -6      | -3.9    | 50   | 0.88  | 23.8  | 64.4  | 13.49 | □   |
| -5.36   | -3.54   | -5.42   | -4      | -6      | -3.9    | 60   | 0.88  | 23.78 | 63.9  | 13.37 | □   |
| -5.12   | -3.6    | -6.1    | -3.9    | -5.77   | -3.68   | 0    | 0.804 | 15.68 | 67.7  | 8.53  | 41  |
| -5.12   | -3.6    | -6.1    | -3.9    | -5.77   | -3.68   | 3    | 0.804 | 17.15 | 68.4  | 9.43  | □   |
| -5.12   | -3.6    | -6.1    | -3.9    | -5.77   | -3.68   | 6    | 0.807 | 16.39 | 65.9  | 8.72  | □   |
| -5.32   | -3.77   | -6      | -4      | -5.28   | -3.48   | 0    | 0.94  | 14.06 | 58.56 | 7.74  | 42  |
| -5.32   | -3.77   | -6      | -4      | -5.28   | -3.48   | 10   | 0.92  | 15.64 | 63.59 | 9.15  | □   |
| -5.32   | -3.77   | -6      | -4      | -5.28   | -3.48   | 20   | 0.9   | 15.98 | 65.72 | 9.45  | □   |
| -5.32   | -3.77   | -6      | -4      | -5.28   | -3.48   | 30   | 0.9   | 15.15 | 63.37 | 8.64  | □   |
| -5.32   | -3.77   | -6      | -4      | -5.28   | -3.48   | 40   | 0.89  | 14.66 | 59.02 | 7.7   | □   |
| -5.32   | -3.77   | -6      | -4      | -5.28   | -3.48   | 100  | 0.85  | 13.16 | 67.94 | 7.6   | □   |

| HOMO(D) | LUMO(D) | HOMO(A) | LUMO(A) | HOMO(T) | LUMO(T) | T(%) | Voc   | Jsc   | FF   | PCE  | Ref |
|---------|---------|---------|---------|---------|---------|------|-------|-------|------|------|-----|
| -5.39   | -3.4    | -5.52   | -3.96   | -5.94   | -3.98   | 0    | 0.945 | 18.67 | 71.4 | 12.6 | 43  |
| -5.39   | -3.4    | -5.52   | -3.96   | -5.94   | -3.98   | 25   | 0.932 | 19.75 | 71.4 | 13.2 | □   |
| -5.45   | -3.65   | -5.6    | -4.3    | -6.1    | -3.8    | 0    | 0.84  | 25.9  | 73   | 15.8 | 44  |
| -5.45   | -3.65   | -5.6    | -4.3    | -6.1    | -3.8    | 17   | 0.84  | 26    | 78   | 17   | □   |
| -5.33   | -3.29   | -5.51   | -3.95   | -6.1    | -4      | 0    | 0.813 | 22.2  | 74   | 13.4 | 45  |
| -5.33   | -3.29   | -5.51   | -3.95   | -6.1    | -4      | 9    | 0.823 | 22.6  | 73.2 | 13.6 | □   |
| -5.33   | -3.29   | -5.51   | -3.95   | -6.1    | -4      | 23   | 0.822 | 23.3  | 74.6 | 14.3 | □   |
| -5.33   | -3.29   | -5.51   | -3.95   | -6.1    | -4      | 33   | 0.822 | 20.4  | 72.3 | 12.1 | □   |
| -5.02   | -3.27   | -6.1    | -3.9    | -5.24   | -3.62   | 0    | 0.834 | 11.89 | 44.4 | 4.4  | 46  |
| -5.02   | -3.27   | -6.1    | -3.9    | -5.24   | -3.62   | 3    | 0.835 | 10.13 | 59.9 | 5.1  | □   |
| -5.02   | -3.27   | -6.1    | -3.9    | -5.24   | -3.62   | 7    | 0.824 | 10.86 | 60.5 | 5.4  | □   |
| -5.02   | -3.27   | -6.1    | -3.9    | -5.24   | -3.62   | 10   | 0.82  | 11.38 | 61.5 | 5.7  | □   |
| -5.02   | -3.27   | -6.1    | -3.9    | -5.24   | -3.62   | 25   | 0.821 | 10.12 | 45.4 | 3.8  | □   |
| -5.02   | -3.27   | -6.1    | -3.9    | -5.24   | -3.62   | 50   | 0.823 | 5.41  | 38.6 | 1.7  | □   |
| -5.02   | -3.27   | -6.1    | -3.9    | -5.24   | -3.62   | 100  | 0.826 | 4.74  | 33.1 | 1.3  | □   |
| -5.12   | -3.34   | -6.1    | -4.3    | -5.21   | -3.36   | 0    | 0.773 | 13.95 | 64   | 6.9  | 47  |
| -5.12   | -3.34   | -6.1    | -4.3    | -5.21   | -3.36   | 20   | 0.8   | 14.36 | 65.3 | 7.5  | □   |
| -5.12   | -3.34   | -6.1    | -4.3    | -5.21   | -3.36   | 30   | 0.812 | 14.68 | 66.3 | 7.9  | □   |
| -5.12   | -3.34   | -6.1    | -4.3    | -5.21   | -3.36   | 40   | 0.827 | 14.82 | 55.9 | 8.2  | □   |
| -5.12   | -3.34   | -6.1    | -4.3    | -5.21   | -3.36   | 50   | 0.842 | 15.41 | 67.5 | 8.8  | □   |
| -5.12   | -3.34   | -6.1    | -4.3    | -5.21   | -3.36   | 60   | 0.855 | 14.42 | 65.7 | 8.1  | □   |

| HOMO(D) | LUMO(D) | HOMO(A) | LUMO(A) | HOMO(T) | LUMO(T) | T(%) | Voc   | Jsc   | FF    | PCE   | Ref |
|---------|---------|---------|---------|---------|---------|------|-------|-------|-------|-------|-----|
| -5.12   | -3.34   | -6.1    | -4.3    | -5.21   | -3.36   | 70   | 0.869 | 12.65 | 65.5  | 7.2   | □   |
| -5.12   | -3.34   | -6.1    | -4.3    | -5.21   | -3.36   | 100  | 0.911 | 10.72 | 65.5  | 6.4   | □   |
| -5.32   | -3.6    | -5.61   | -3.74   | -6      | -4      | 0    | 1.07  | 13.04 | 56    | 7.81  | 48  |
| -5.32   | -3.6    | -5.61   | -3.74   | -6      | -4      | 25   | 0.97  | 16.27 | 63    | 9.94  | □   |
| -5.32   | -3.6    | -5.61   | -3.74   | -6      | -4      | 100  | 0.79  | 10.48 | 58    | 4.8   | □   |
| -5.39   | -3.17   | -5.51   | -3.78   | -5.96   | -3.98   | 0    | 0.943 | 16.96 | 62.82 | 10.04 | 49  |
| -5.39   | -3.17   | -5.51   | -3.78   | -5.96   | -3.98   | 17   | 0.939 | 18.05 | 66.67 | 11.31 | □   |
| -5.39   | -3.17   | -5.51   | -3.78   | -5.96   | -3.98   | 100  | 0.935 | 11.98 | 58.65 | 6.57  | □   |
| -5.26   | -3.63   | -6      | -4.19   | -5.35   | -3.75   | 0    | 0.847 | 13.21 | 72.6  | 8.12  | 50  |
| -5.26   | -3.63   | -6      | -4.19   | -5.35   | -3.75   | 50   | 0.856 | 21.19 | 67.2  | 12.19 | □   |
| -5.26   | -3.63   | -6      | -4.19   | -5.35   | -3.75   | 100  | 0.864 | 18.56 | 59.5  | 9.54  | □   |
| -5.36   | -3.54   | -5.49   | -4.01   | -6      | -3.9    | 0    | 0.86  | 19.01 | 58.61 | 9.58  | 51  |
| -5.36   | -3.54   | -5.49   | -4.01   | -6      | -3.9    | 25   | 0.88  | 20.58 | 60.74 | 11    | □   |
| -5.36   | -3.54   | -5.49   | -4.01   | -6      | -3.9    | 40   | 0.88  | 20.59 | 65.27 | 11.82 | □   |
| -5.36   | -3.54   | -5.49   | -4.01   | -6      | -3.9    | 50   | 0.86  | 19.62 | 66.3  | 11.19 | □   |
| -5.15   | -3.31   | -6.1    | -4.2    | -6.1    | -3.8    | 0    | 0.68  | 14.2  | 52.6  | 5.35  | 52  |
| -5.15   | -3.31   | -6.1    | -4.2    | -6.1    | -3.8    | 10   | 0.7   | 14.8  | 54.1  | 5.79  | □   |
| -5.15   | -3.31   | -6.1    | -4.2    | -6.1    | -3.8    | 20   | 0.71  | 15.3  | 55.7  | 6.33  | □   |
| -5.15   | -3.31   | -6.1    | -4.2    | -6.1    | -3.8    | 30   | 0.72  | 17.5  | 58.2  | 7.33  | □   |
| -5.15   | -3.31   | -6.1    | -4.2    | -6.1    | -3.8    | 40   | 0.72  | 19.3  | 59.2  | 8.23  | □   |
| -5.15   | -3.31   | -6.1    | -4.2    | -6.1    | -3.8    | 50   | 0.72  | 18.1  | 54.7  | 7.14  | □   |

| HOMO(D) | LUMO(D) | HOMO(A) | LUMO(A) | HOMO(T) | LUMO(T) | T(%) | Voc   | Jsc   | FF    | PCE   | Ref |
|---------|---------|---------|---------|---------|---------|------|-------|-------|-------|-------|-----|
| -5.48   | -3.52   | -5.63   | -3.97   | -6      | -3.9    | 0    | 0.89  | 19.8  | 59.05 | 10.43 | 53  |
| -5.48   | -3.52   | -5.63   | -3.97   | -6      | -3.9    | 20   | 0.9   | 20.04 | 59.69 | 10.71 | □   |
| -5.48   | -3.52   | -5.63   | -3.97   | -6      | -3.9    | 35   | 0.89  | 20.75 | 60.94 | 11.26 | □   |
| -5.48   | -3.52   | -5.63   | -3.97   | -6      | -3.9    | 50   | 0.88  | 19.17 | 57.53 | 9.68  | □   |
| -5.51   | -3.3    | -6      | -4      | -5.41   | -3.38   | 0    | 0.73  | 15.3  | 65.25 | 7.2   | 54  |
| -5.51   | -3.3    | -6      | -4      | -5.41   | -3.38   | 10   | 0.74  | 16.7  | 64.14 | 8     | □   |
| -5.48   | -3.64   | -5.53   | -3.83   | -5.54   | -3.87   | 0    | 0.89  | 17.24 | 70.98 | 10.9  | 55  |
| -5.48   | -3.64   | -5.53   | -3.83   | -5.54   | -3.87   | 15   | 0.9   | 18.1  | 70.81 | 11.55 | □   |
| -5.48   | -3.64   | -5.53   | -3.83   | -5.54   | -3.87   | 30   | 0.89  | 19.29 | 70.18 | 12.36 | □   |
| -5.26   | 3.63    | -5.5    | -3.79   | -6      | -4.19   | 0    | 0.822 | 19.19 | 60.2  | 9.5   | 56  |
| -5.26   | 3.63    | -5.5    | -3.79   | -6      | -4.19   | 20   | 0.829 | 19.14 | 65.6  | 10.41 | □   |
| -5      | -3.4    | -5.8    | -4      | -5.29   | -3.31   | 0    | 0.795 | 16.67 | 63.7  | 8.44  | 57  |
| -5      | -3.4    | -5.8    | -4      | -5.29   | -3.31   | 6    | 0.811 | 16.81 | 63    | 8.59  | □   |
| -5      | -3.4    | -5.8    | -4      | -5.17   | -3.16   | 6    | 0.802 | 17.26 | 65.6  | 9.08  | 57  |
| -5.21   | -2.99   | -5.44   | -4.19   | -6.1    | -3.9    | 0    | 0.675 | 22.27 | 61.3  | 9.21  | 58  |
| -5.21   | -2.99   | -5.44   | -4.19   | -6.1    | -3.9    | 20   | 0.69  | 22.6  | 65.7  | 10.26 | □   |
| -5.21   | -2.99   | -5.44   | -4.19   | -6.1    | -3.9    | 40   | 0.698 | 22.7  | 67.4  | 10.68 | □   |
| -5.21   | -2.99   | -5.44   | -4.19   | -6.1    | -3.9    | 60   | 0.713 | 19.67 | 69.3  | 9.73  | □   |
| -5.21   | -2.99   | -5.44   | -4.19   | -6.1    | -3.9    | 100  | 0.723 | 10.15 | 69.7  | 5.12  | □   |
| -5.33   | -2.92   | -5.72   | -3.85   | -5.96   | -3.98   | 0    | 0.86  | 15.7  | 71.6  | 9.65  | 59  |
| -5.33   | -2.92   | -5.72   | -3.85   | -5.96   | -3.98   | 20   | 0.87  | 16.8  | 72.11 | 10.67 | □   |

| HOMO(D) | LUMO(D) | HOMO(A) | LUMO(A) | HOMO(T) | LUMO(T) | T(%) | Voc  | Jsc   | FF    | PCE   | Ref |
|---------|---------|---------|---------|---------|---------|------|------|-------|-------|-------|-----|
| -5.33   | -2.92   | -5.72   | -3.85   | -5.96   | -3.98   | 40   | 0.88 | 16.35 | 71.21 | 10.27 | □   |
| -5.33   | -2.92   | -5.72   | -3.85   | -5.96   | -3.98   | 60   | 0.88 | 15.76 | 69.78 | 9.78  | □   |
| -5.33   | -2.92   | -5.72   | -3.85   | -5.96   | -3.98   | 80   | 0.87 | 15.18 | 69.46 | 9.24  | □   |
| -5.33   | -2.92   | -5.72   | -3.85   | -5.96   | -3.98   | 100  | 0.86 | 13.3  | 64.67 | 7.47  | □   |
| -5.2    | -3.3    | -6.1    | -3.9    | -4.9    | -4.2    | 0    | 0.73 | 14.48 | 47    | 4.98  | 60  |
| -5.2    | -3.3    | -6.1    | -3.9    | -4.9    | -4.2    | 25   | 0.64 | 11.15 | 23    | 1.57  | □   |
| -5.2    | -3.3    | -6.1    | -3.9    | -4.9    | -4.2    | 50   | 0.77 | 15.31 | 52    | 6.02  | □   |
| -5.2    | -3.3    | -6.1    | -3.9    | -4.9    | -4.2    | 100  | 0.71 | 15.21 | 50    | 5.48  | □   |
| -5.36   | -3.54   | -5.37   | -3.73   | -6      | -3.9    | 0    | 1    | 12.69 | 57.6  | 7.31  | 61  |
| -5.36   | -3.54   | -5.37   | -3.73   | -6      | -3.9    | 33   | 0.9  | 15.55 | 52.7  | 7.38  | □   |
| -5.36   | -3.54   | -5.37   | -3.73   | -6      | -3.9    | 50   | 0.88 | 16.78 | 56.4  | 8.32  | □   |
| -5.36   | -3.54   | -5.37   | -3.73   | -6      | -3.9    | 60   | 0.84 | 17.03 | 56.4  | 8.29  | □   |
| -5.36   | -3.54   | -5.43   | -3.94   | -6      | -3.9    | 0    | 0.88 | 15.19 | 56.3  | 7.52  | 61  |
| -5.36   | -3.54   | -5.43   | -3.94   | -6      | -3.9    | 33   | 0.86 | 16.97 | 61.8  | 9.01  | □   |
| -5.36   | -3.54   | -5.43   | -3.94   | -6      | -3.9    | 50   | 0.84 | 16.98 | 61.9  | 8.83  | □   |
| -5.36   | -3.54   | -5.43   | -3.94   | -6      | -3.9    | 60   | 0.84 | 17.79 | 61.4  | 9.18  | □   |
| -5.1    | -3.4    | -6.1    | -4.3    | -5.5    | -3.6    | 0    | 0.83 | 9.47  | 47.77 | 3.75  | 62  |
| -5.1    | -3.4    | -6.1    | -4.3    | -5.5    | -3.6    | 9    | 0.84 | 9.74  | 49.43 | 4.04  | □   |
| -5.1    | -3.4    | -6.1    | -4.3    | -5.5    | -3.6    | 23   | 0.84 | 10.19 | 50.76 | 4.35  | □   |
| -5.1    | -3.4    | -6.1    | -4.3    | -5.5    | -3.6    | 33   | 0.85 | 10.12 | 51.64 | 4.44  | □   |
| -5.1    | -3.4    | -6.1    | -4.3    | -5.5    | -3.6    | 41   | 0.85 | 10.86 | 51.98 | 4.8   | □   |

| HOMO(D) | LUMO(D) | HOMO(A) | LUMO(A) | HOMO(T) | LUMO(T) | T(%) | Voc   | Jsc   | FF    | PCE   | Ref |
|---------|---------|---------|---------|---------|---------|------|-------|-------|-------|-------|-----|
| -5.1    | -3.4    | -6.1    | -4.3    | -5.5    | -3.6    | 50   | 0.87  | 10.46 | 50.92 | 4.64  | □   |
| -5.1    | -3.4    | -6.1    | -4.3    | -5.5    | -3.6    | 100  | 0.87  | 6.52  | 57.59 | 3.27  | □   |
| -5.22   | -3.64   | -6.1    | -4.3    | -5.51   | -4.08   | 0    | 0.778 | 16.21 | 60.1  | 7.58  | 63  |
| -5.22   | -3.64   | -6.1    | -4.3    | -5.51   | -4.08   | 3.3  | 0.8   | 16.33 | 64.8  | 8.46  | □   |
| -5.22   | -3.64   | -6.1    | -4.3    | -5.51   | -4.08   | 6.7  | 0.795 | 17.21 | 64.3  | 8.8   | □   |
| -5.22   | -3.64   | -6.1    | -4.3    | -5.51   | -4.08   | 13.3 | 0.792 | 17.5  | 60.6  | 8.4   | □   |
| -5.22   | -3.64   | -6.1    | -4.3    | -5.51   | -4.08   | 26.7 | 0.788 | 18.53 | 55.5  | 8.1   | □   |
| -5.22   | -3.64   | -6.1    | -4.3    | -5.51   | -4.08   | 40   | 0.787 | 18.12 | 48.9  | 6.98  | □   |
| -5.22   | -3.64   | -6.1    | -4.3    | -5.51   | -4.08   | 60   | 0.735 | 5.51  | 29.1  | 1.18  | □   |
| -5.22   | -3.64   | -6.1    | -4.3    | -5.51   | -4.08   | 5    | 0.803 | 19    | 61.6  | 9.48  | □   |
| -5.24   | -3.61   | -6      | -4      | -5.54   | -2.79   | 0    | 0.77  | 18.39 | 65.49 | 9.26  | 64  |
| -5.24   | -3.61   | -6      | -4      | -5.54   | -2.79   | 5    | 0.77  | 18.66 | 66.13 | 9.59  | □   |
| -5.24   | -3.61   | -6      | -4      | -5.54   | -2.79   | 10   | 0.78  | 19.14 | 67.26 | 10.05 | □   |
| -5.24   | -3.61   | -6      | -4      | -5.54   | -2.79   | 15   | 0.78  | 19.45 | 67.61 | 10.27 | □   |
| -5.24   | -3.61   | -6      | -4      | -5.54   | -2.79   | 20   | 0.78  | 18.14 | 67.35 | 9.49  | □   |
| -5.33   | -3.53   | -6.1    | -4.3    | -5.58   | -3.98   | 0    | 0.836 | 11.99 | 67.54 | 6.77  | 65  |
| -5.33   | -3.53   | -6.1    | -4.3    | -5.58   | -3.98   | 30   | 0.863 | 13.98 | 67.26 | 8.16  | □   |
| -5.33   | -3.53   | -6.1    | -4.3    | -5.58   | -3.98   | 50   | 0.871 | 15.29 | 68.29 | 9.1   | □   |
| -5.33   | -3.53   | -6.1    | -4.3    | -5.58   | -3.98   | 70   | 0.897 | 15.51 | 67.74 | 9.43  | □   |
| -5.33   | -3.53   | -6.1    | -4.3    | -5.58   | -3.98   | 80   | 0.915 | 16.44 | 67.58 | 10.17 | □   |
| -5.33   | -3.53   | -6.1    | -4.3    | -5.58   | -3.98   | 90   | 0.926 | 15.44 | 69.07 | 9.87  | □   |

| HOMO(D) | LUMO(D) | HOMO(A) | LUMO(A) | HOMO(T) | LUMO(T) | T(%) | Voc   | Jsc   | FF    | PCE   | Ref |
|---------|---------|---------|---------|---------|---------|------|-------|-------|-------|-------|-----|
| -5.33   | -3.53   | -6.1    | -4.3    | -5.58   | -3.98   | 100  | 0.93  | 14.59 | 65.7  | 8.88  | □   |
| -5.51   | -3.71   | -5.65   | -4.1    | -5.96   | -3.98   | 0    | 0.868 | 24.98 | 71.42 | 15.49 | 66  |
| -5.51   | -3.71   | -5.65   | -4.1    | -5.96   | -3.98   | 8    | 0.868 | 25.33 | 73.93 | 16.25 | □   |
| -5.51   | -3.71   | -5.65   | -4.1    | -5.96   | -3.98   | 14   | 0.868 | 25.44 | 75.66 | 16.71 | □   |
| -5.51   | -3.71   | -5.65   | -4.1    | -5.96   | -3.98   | 20   | 0.868 | 25.28 | 74.23 | 16.29 | □   |
| -5.51   | -3.71   | -5.65   | -4.1    | -5.96   | -3.98   | 29   | 0.868 | 24.9  | 72.27 | 15.62 | □   |
| -5.51   | -3.71   | -5.65   | -4.1    | -5.96   | -3.98   | 45   | 0.868 | 23.9  | 68.29 | 14.17 | □   |
| -5.51   | -3.71   | -5.65   | -4.1    | -5.96   | -3.98   | 100  | 0.97  | 11.73 | 63.83 | 7.28  | □   |
| -5.02   | -3.27   | -6.1    | -3.9    | -5.22   | -3.46   | 0    | 0.88  | 13.52 | 74.9  | 8.9   | 67  |
| -5.02   | -3.27   | -6.1    | -3.9    | -5.22   | -3.46   | 10   | 0.896 | 14.97 | 76.5  | 10.26 | □   |
| -5.02   | -3.27   | -6.1    | -3.9    | -5.22   | -3.46   | 20   | 0.901 | 12.67 | 74.7  | 8.52  | □   |
| -5.02   | -3.27   | -6.1    | -3.9    | -5.22   | -3.46   | 40   | 0.895 | 12.56 | 61.5  | 6.92  | □   |
| -5.02   | -3.27   | -6.1    | -3.9    | -5.22   | -3.46   | 60   | 0.902 | 12.38 | 58.4  | 6.52  | □   |
| -5.02   | -3.27   | -6.1    | -3.9    | -5.22   | -3.46   | 80   | 0.92  | 11.24 | 54.7  | 5.66  | □   |
| -5.02   | -3.27   | -6.1    | -3.9    | -5.22   | -3.46   | 100  | 0.944 | 10.85 | 68.2  | 6.99  | □   |
| -5.24   | -3.66   | -5.42   | -4.17   | -6.19   | -4      | 0    | 0.662 | 25.89 | 71.2  | 12.21 | 68  |
| -5.24   | -3.66   | -5.42   | -4.17   | -6.19   | -4      | 11   | 0.666 | 27.36 | 71.9  | 13.1  | □   |
| -5.24   | -3.66   | -5.42   | -4.17   | -6.19   | -4      | 20   | 0.669 | 27.73 | 73    | 13.54 | □   |
| -5.24   | -3.66   | -5.42   | -4.17   | -6.19   | -4      | 27   | 0.671 | 27.29 | 69    | 12.63 | □   |
| -5.2    | -3.6    | -6      | -3.9    | -5.7    | -3.9    | 0    | 0.78  | 17.2  | 70    | 9.4   | 69  |
| -5.2    | -3.6    | -6      | -3.9    | -5.7    | -3.9    | 5    | 0.77  | 17.8  | 70    | 9.7   | □   |



| HOMO(D) | LUMO(D) | HOMO(A) | LUMO(A) | HOMO(T) | LUMO(T) | T(%) | Voc   | Jsc   | FF    | PCE   | Ref |
|---------|---------|---------|---------|---------|---------|------|-------|-------|-------|-------|-----|
| -5.2    | -3.6    | -6      | -3.9    | -5.7    | -3.9    | 10   | 0.78  | 19.4  | 68    | 10.2  | □   |
| -5.2    | -3.6    | -6      | -3.9    | -5.7    | -3.9    | 20   | 0.77  | 19.4  | 67    | 10    | □   |
| -5.2    | -3.6    | -6      | -3.9    | -5.7    | -3.9    | 30   | 0.76  | 13.6  | 65    | 6.7   | □   |
| -5.2    | -3.6    | -6.1    | -3.9    | -5.28   | -2.24   | 0    | 0.77  | 18.66 | 61.03 | 8.91  | 70  |
| -5.2    | -3.6    | -6.1    | -3.9    | -5.28   | -2.24   | 5    | 0.77  | 19.74 | 62.34 | 9.81  | □   |
| -5.2    | -3.6    | -6.1    | -3.9    | -5.28   | -2.24   | 10   | 0.78  | 20.18 | 64.2  | 10.44 | □   |
| -5.2    | -3.6    | -6.1    | -3.9    | -5.28   | -2.24   | 15   | 0.78  | 21.47 | 68.31 | 11.44 | □   |
| -5.2    | -3.6    | -6.1    | -3.9    | -5.28   | -2.24   | 20   | 0.78  | 20.24 | 62.02 | 9.79  | □   |
| -5.24   | -3.66   | -6      | -4      | -5.19   | -3.19   | 0    | 0.77  | 11.4  | 36.5  | 3.2   | 71  |
| -5.24   | -3.66   | -6      | -4      | -5.19   | -3.19   | 10   | 0.778 | 15    | 52    | 6.09  | □   |
| -5.44   | -3.55   | -6.19   | -4      | -5.49   | -3.81   | 0    | 0.86  | 12.26 | 72    | 7.59  | 72  |
| -5.44   | -3.55   | -6.19   | -4      | -5.49   | -3.81   | 50   | 0.89  | 14.35 | 64    | 8.17  | □   |
| -5.44   | -3.55   | -6.19   | -4      | -5.38   | -3.56   | 0    | 0.86  | 12.26 | 72    | 7.59  | 72  |
| -5.44   | -3.55   | -6.19   | -4      | -5.38   | -3.56   | 50   | 0.82  | 14.77 | 72    | 8.72  | □   |
| -5.22   | -3.64   | -5.44   | -4.19   | -5.96   | -3.98   | 0    | 0.74  | 20.62 | 58.55 | 8.96  | 73  |
| -5.22   | -3.64   | -5.44   | -4.19   | -5.96   | -3.98   | 6    | 0.74  | 23.63 | 58    | 10.15 | □   |
| -5.54   | -3.65   | -5.56   | -3.95   | -5.96   | -3.98   | 0    | 0.877 | 24.4  | 70.4  | 15.1  | 74  |
| -5.54   | -3.65   | -5.56   | -3.95   | -5.96   | -3.98   | 17   | 0.881 | 25.1  | 72.6  | 16.1  | □   |
| -5.3    | -3.5    | -5.6    | -4.1    | -6.1    | -4.2    | 0    | 0.846 | 22.13 | 57.67 | 10.8  | 75  |
| -5.3    | -3.5    | -5.6    | -4.1    | -6.1    | -4.2    | 20   | 0.855 | 22.45 | 58.93 | 11.31 | □   |
| -5.3    | -3.5    | -5.6    | -4.1    | -6.1    | -4.2    | 30   | 0.859 | 22.21 | 62    | 11.82 | □   |

| HOMO(D) | LUMO(D) | HOMO(A) | LUMO(A) | HOMO(T) | LUMO(T) | T(%) | Voc   | Jsc   | FF    | PCE   | Ref |
|---------|---------|---------|---------|---------|---------|------|-------|-------|-------|-------|-----|
| -5.3    | -3.5    | -5.6    | -4.1    | -6.1    | -4.2    | 40   | 0.86  | 21.11 | 62.52 | 11.35 | □   |
| -5.3    | -3.5    | -5.6    | -4.1    | -6.1    | -4.2    | 50   | 0.863 | 19.18 | 64.13 | 10.62 | □   |
| -5.3    | -3.5    | -5.6    | -4.1    | -6.1    | -4.2    | 100  | 0.955 | 8.08  | 63.53 | 4.9   | □   |
| -5.68   | -3.71   | -5.74   | -4.1    | -6.1    | -3.98   | 0    | 0.88  | 17.15 | 71.6  | 10.8  | 76  |
| -5.68   | -3.71   | -5.74   | -4.1    | -6.1    | -3.98   | 9    | 0.89  | 17.55 | 72.92 | 11.39 | □   |
| -5.68   | -3.71   | -5.74   | -4.1    | -6.1    | -3.98   | 17   | 0.9   | 18.42 | 74.61 | 12.37 | □   |
| -5.68   | -3.71   | -5.74   | -4.1    | -6.1    | -3.98   | 20   | 0.91  | 18.49 | 74.92 | 12.61 | □   |
| -5.68   | -3.71   | -5.74   | -4.1    | -6.1    | -3.98   | 23   | 0.91  | 18.23 | 74.3  | 12.33 | □   |
| -5.68   | -3.71   | -5.74   | -4.1    | -6.1    | -3.98   | 33   | 0.92  | 17.5  | 71.82 | 11.56 | □   |
| -5.68   | -3.71   | -5.74   | -4.1    | -6.1    | -3.98   | 50   | 0.93  | 16.7  | 65.6  | 10.19 | □   |
| -5.68   | -3.71   | -5.74   | -4.1    | -6.1    | -3.98   | 100  | 0.94  | 13.23 | 64    | 7.96  | □   |
| -5.13   | -3.48   | -5.34   | -3.81   | -6.1    | -4.1    | 0    | 0.88  | 13.86 | 61    | 7.44  | 77  |
| -5.13   | -3.48   | -5.34   | -3.81   | -6.1    | -4.1    | 20   | 0.82  | 16.04 | 68    | 8.94  | □   |
| -5.13   | -3.48   | -5.34   | -3.81   | -6.1    | -4.1    | 100  | 0.69  | 12.46 | 59    | 5.07  | □   |
| -5.5    | -3.6    | -6      | -4      | -5.8    | -3.9    | 0    | 0.92  | 12.59 | 67    | 7.38  | 78  |
| -5.5    | -3.6    | -6      | -4      | -5.8    | -3.9    | 30   | 0.91  | 13.01 | 69    | 8.11  | □   |
| -5.5    | -3.6    | -6      | -4      | -5.8    | -3.9    | 100  | 0.89  | 12.26 | 63    | 7.34  | □   |
| -5.38   | -3.3    | -5.54   | -3.7    | -6.1    | -4.3    | 0    | 1.04  | 20.38 | 62    | 13.14 | 79  |
| -5.38   | -3.3    | -5.54   | -3.7    | -6.1    | -4.3    | 25   | 0.97  | 22.65 | 71    | 15.6  | □   |
| -5.38   | -3.3    | -5.54   | -3.7    | -6.1    | -4.3    | 100  | 0.89  | 11.22 | 67    | 6.69  | □   |
| -5.39   | -3.57   | -5.69   | -3.91   | -5.79   | -3.85   | 0    | 0.87  | 17.65 | 71.5  | 11.02 | 80  |

| HOMO(D) | LUMO(D) | HOMO(A) | LUMO(A) | HOMO(T) | LUMO(T) | T(%) | Voc  | Jsc   | FF    | PCE   | Ref |
|---------|---------|---------|---------|---------|---------|------|------|-------|-------|-------|-----|
| -5.39   | -3.57   | -5.69   | -3.91   | -5.79   | -3.85   | 10   | 0.89 | 18.69 | 70.88 | 11.86 | □   |
| -5.39   | -3.57   | -5.69   | -3.91   | -5.79   | -3.85   | 20   | 0.89 | 19.41 | 64.14 | 11.08 | □   |
| -5.39   | -3.57   | -5.69   | -3.91   | -5.79   | -3.85   | 50   | 0.91 | 16.06 | 64.49 | 9.45  | □   |
| -5.39   | -3.57   | -5.69   | -3.91   | -5.79   | -3.85   | 100  | 0.93 | 12.63 | 61.96 | 7.28  | □   |
| -5.4    | -3.55   | -5.96   | -4.26   | -5.49   | -3.9    | 0    | 0.84 | 10.87 | 57.1  | 5.28  | 81  |
| -5.4    | -3.55   | -5.96   | -4.26   | -5.49   | -3.9    | 10   | 0.87 | 11.5  | 61    | 6.21  | □   |
| -5.4    | -3.55   | -5.96   | -4.26   | -5.49   | -3.9    | 15   | 0.88 | 12.01 | 63    | 6.73  | □   |
| -5.4    | -3.55   | -5.96   | -4.26   | -5.49   | -3.9    | 20   | 0.86 | 11.63 | 62.8  | 6.39  | □   |
| -5.4    | -3.55   | -5.96   | -4.26   | -5.49   | -3.9    | 30   | 0.84 | 11.22 | 59.4  | 5.62  | □   |
| -5.4    | -3.55   | -5.96   | -4.26   | -5.49   | -3.9    | 100  | 0.8  | 5.91  | 60.9  | 2.93  | □   |
| -5.36   | -3.52   | -5.96   | -3.98   | -5.51   | -3.78   | 0    | 0.87 | 12    | 53.2  | 5.7   | 82  |
| -5.36   | -3.52   | -5.96   | -3.98   | -5.51   | -3.78   | 25   | 0.87 | 14.2  | 54    | 7     | □   |
| -5.36   | -3.52   | -5.96   | -3.98   | -5.51   | -3.78   | 37.5 | 0.87 | 12.9  | 53.2  | 6.1   | □   |
| -5.36   | -3.52   | -5.96   | -3.98   | -5.51   | -3.78   | 50   | 0.91 | 12.1  | 53.4  | 6.1   | □   |
| -5.36   | -3.52   | -5.96   | -3.98   | -5.51   | -3.78   | 62.5 | 0.91 | 11.2  | 52.5  | 5.6   | □   |
| -5.36   | -3.52   | -5.96   | -3.98   | -5.51   | -3.78   | 71   | 0.94 | 10.1  | 50.5  | 4.9   | □   |
| -5.36   | -3.52   | -5.96   | -3.98   | -5.51   | -3.78   | 100  | 0.97 | 8.3   | 49    | 4.2   | □   |
| -5.11   | -3.4    | -5.82   | -4.18   | -5.91   | -4.1    | 0    | 0.87 | 15.2  | 64    | 8.7   | 83  |
| -5.11   | -3.4    | -5.82   | -4.18   | -5.91   | -4.1    | 29   | 0.87 | 16.3  | 72    | 10.8  | □   |
| -5.11   | -3.4    | -5.82   | -4.18   | -5.91   | -4.1    | 41   | 0.86 | 16.4  | 70    | 10.3  | □   |
| -5.11   | -3.4    | -5.82   | -4.18   | -5.91   | -4.1    | 50   | 0.85 | 16.4  | 69    | 9.9   | □   |

| HOMO(D) | LUMO(D) | HOMO(A) | LUMO(A) | HOMO(T) | LUMO(T) | T(%) | Voc  | Jsc   | FF    | PCE  | Ref |
|---------|---------|---------|---------|---------|---------|------|------|-------|-------|------|-----|
| -5.11   | -3.4    | -5.82   | -4.18   | -5.91   | -4.1    | 67   | 0.81 | 14.1  | 60    | 7.2  | □   |
| -5.22   | -3.64   | -6.1    | -3.9    | -5.43   | -3.33   | 0    | 0.82 | 16.4  | 71.2  | 9.5  | 84  |
| -5.22   | -3.64   | -6.1    | -3.9    | -5.43   | -3.33   | 5    | 0.82 | 16    | 72    | 9.8  | □   |
| -5.22   | -3.64   | -6.1    | -3.9    | -5.43   | -3.33   | 10   | 0.82 | 17.3  | 72.2  | 10.3 | □   |
| -5.22   | -3.64   | -6.1    | -3.9    | -5.43   | -3.33   | 15   | 0.83 | 16.5  | 68    | 9.3  | □   |
| -5.22   | -3.64   | -6.1    | -3.9    | -5.43   | -3.33   | 100  | 0.83 | 11.8  | 68    | 7.5  | □   |
| -5.2    | -3.3    | -6      | -4.3    | -5.3    | -3.5    | 0    | 0.75 | 14.12 | 64.83 | 6.86 | 85  |
| -5.2    | -3.3    | -6      | -4.3    | -5.3    | -3.5    | 3    | 0.75 | 14.86 | 67.01 | 7.47 | □   |
| -5.2    | -3.3    | -6      | -4.3    | -5.3    | -3.5    | 6    | 0.75 | 15.29 | 69.09 | 7.92 | □   |
| -5.2    | -3.3    | -6      | -4.3    | -5.3    | -3.5    | 9    | 0.75 | 14.55 | 66.12 | 7.22 | □   |
| -5.2    | -3.3    | -6      | -4.3    | -5.3    | -3.5    | 12   | 0.75 | 14.01 | 63.3  | 6.65 | □   |
| -5.2    | -3.3    | -6      | -4.3    | -5.3    | -3.5    | 100  | 0.77 | 8.28  | 35.92 | 2.29 | □   |
| -5.4    | -3.8    | -6.1    | -4.3    | -5.6    | -3.6    | 0    | 0.81 | 14.05 | 52.01 | 5.98 | 86  |
| -5.4    | -3.8    | -6.1    | -4.3    | -5.6    | -3.6    | 10   | 0.8  | 15.93 | 62.2  | 8.2  | □   |
| -5.4    | -3.8    | -6.1    | -4.3    | -5.6    | -3.6    | 20   | 0.8  | 15.5  | 66.92 | 8.4  | □   |
| -5.4    | -3.8    | -6.1    | -4.3    | -5.6    | -3.6    | 30   | 0.8  | 15.4  | 69.08 | 8.64 | □   |
| -5.4    | -3.8    | -6.1    | -4.3    | -5.6    | -3.6    | 40   | 0.8  | 15.15 | 68.05 | 8.46 | □   |
| -5.15   | -3.3    | -6      | -4.3    | -5.66   | -4.13   | 0    | 0.76 | 16.2  | 61.8  | 7.61 | 87  |
| -5.15   | -3.3    | -6      | -4.3    | -5.66   | -4.13   | 1    | 0.76 | 16.54 | 63    | 7.92 | □   |
| -5.15   | -3.3    | -6      | -4.3    | -5.66   | -4.13   | 2    | 0.76 | 17.21 | 64    | 8.37 | □   |
| -5.15   | -3.3    | -6      | -4.3    | -5.66   | -4.13   | 3    | 0.76 | 16.53 | 62.4  | 7.84 | □   |

| HOMO(D) | LUMO(D) | HOMO(A) | LUMO(A) | HOMO(T) | LUMO(T) | T(%) | Voc   | Jsc  | FF   | PCE   | Ref |
|---------|---------|---------|---------|---------|---------|------|-------|------|------|-------|-----|
| -5.34   | -3.69   | -6      | -4      | -5.4    | -3.27   | 0    | 0.75  | 19.5 | 72.2 | 10.57 | 88  |
| -5.34   | -3.69   | -6      | -4      | -5.4    | -3.27   | 5    | 0.76  | 19.2 | 74.3 | 10.89 | □   |
| -5.34   | -3.69   | -6      | -4      | -5.4    | -3.27   | 10   | 0.77  | 19   | 75.1 | 11.07 | □   |
| -5.34   | -3.69   | -6      | -4      | -5.4    | -3.27   | 15   | 0.79  | 18.8 | 74.7 | 11.17 | □   |
| -5.34   | -3.69   | -6      | -4      | -5.4    | -3.27   | 20   | 0.81  | 17.9 | 73.1 | 10.56 | □   |
| -5.34   | -3.69   | -6      | -4      | -5.4    | -3.27   | 30   | 0.82  | 16.2 | 67.1 | 9.1   | □   |
| -5.33   | -3.29   | -5.41   | -3.97   | -6      | -4      | 0    | 0.85  | 21.3 | 66.9 | 12.1  | 89  |
| -5.33   | -3.29   | -5.41   | -3.97   | -6      | -4      | 13   | 0.857 | 22.8 | 71.6 | 14    | □   |
| -5.33   | -3.29   | -5.41   | -3.97   | -6      | -4      | 23   | 0.858 | 20.2 | 67.3 | 11.6  | □   |
| -5.24   | -3.66   | -6      | -4      | -5.49   | -4.04   | 0    | 0.81  | 15.2 | 69.6 | 8.6   | 90  |
| -5.24   | -3.66   | -6      | -4      | -5.49   | -4.04   | 17   | 0.82  | 14.3 | 53   | 6.2   | □   |
| -5.24   | -3.66   | -6      | -4      | -5.49   | -4.04   | 33   | 0.82  | 14   | 52.5 | 6     | □   |
| -5.24   | -3.66   | -6      | -4      | -5.49   | -4.04   | 50   | 0.83  | 12.3 | 52   | 5.3   | □   |
| -5.24   | -3.66   | -6      | -4      | -5.49   | -4.04   | 67   | 0.8   | 9.3  | 49.1 | 3.7   | □   |
| -5.24   | -3.66   | -6      | -4      | -5.49   | -4.04   | 100  | 0.8   | 10.4 | 56.5 | 4.7   | □   |
