# Supplementary material for: Accelerated exploration of efficient ternary solar cells with PTB7:PC71BM:SMPV1 using machine-learning methods
Source: Royal Society of Chemistry journal article supplement (doi:10.1039/d2cp02368g), 2022-01-01
Supplement: d2cp02368g2.pdf [file d2cp02368g2.pdf]

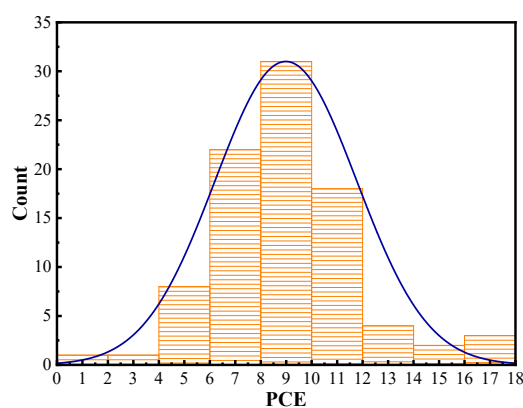

**Figure S1** Optimal PCE distribution histogram of the original dataset of reported PC<sub>71</sub>BM-based ternary OSCs

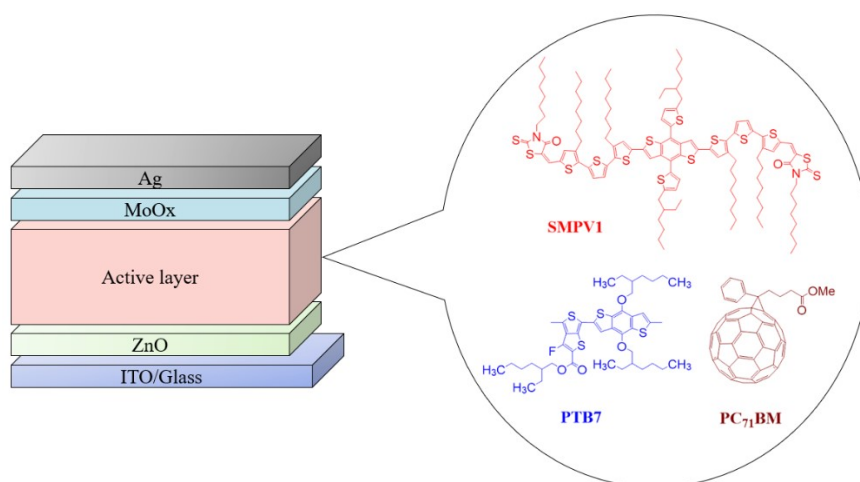

**Figure S2** The chemical structures of SMPV1, PTB7 and PC<sub>71</sub>BM and the structure diagram of devices.

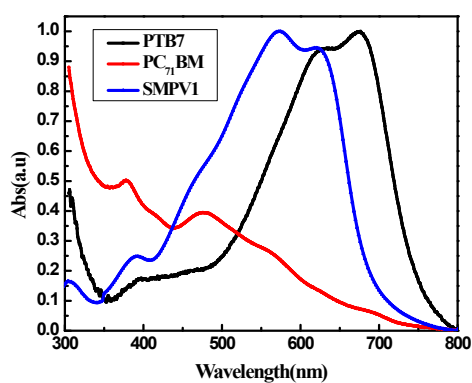

**Figure S3** Absorption spectra of pure SMPV1, PTB7 and PC<sub>71</sub>BM films.

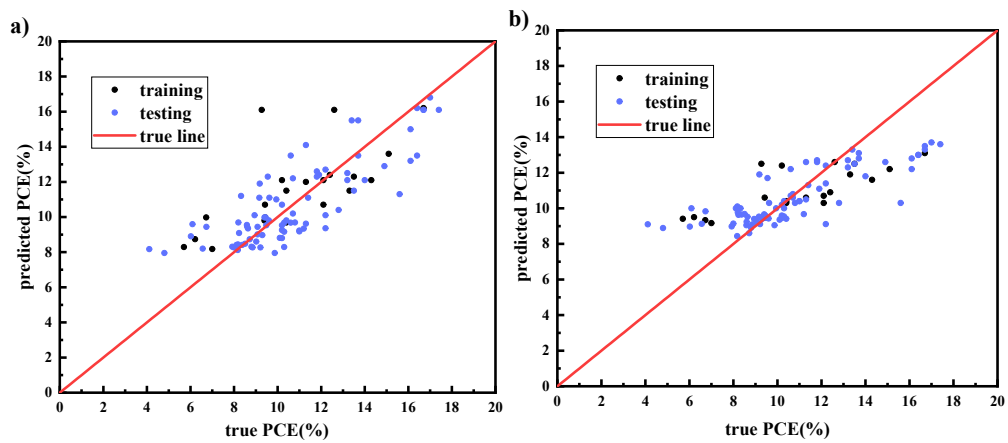

**Figure S4** The plots of the relationship between the true PCE and the predicted PCE predicted by (a) KNN and (b) SVM
