# Supplementary material for: Accelerated exploration of efficient ternary solar cells with PTB7:PC71BM:SMPV1 using machine-learning methods
Source: Royal Society of Chemistry journal article supplement (doi:10.1039/d2cp02368g), 2022-01-01
Supplement: d2cp02368g3.pdf [file d2cp02368g3.pdf]

## Supporting Information

### Accelerated Explore of Efficient Ternary Solar Cell with PTB7:PC<sub>71</sub>BM:SMPV1 Using Machine-Learning Methods

Chaorong Guo<sup>a</sup>, Zhennan Li<sup>a</sup>, Kuo Wang<sup>a</sup>, Xunchen Zhou<sup>a</sup>, Di Huang<sup>a,\*</sup>, Jiaojiao Liang<sup>a,\*</sup>, Ling Zhao<sup>b,\*</sup>

*a*, Hunan University of Technology, Zhuzhou 412008, China

*b*, Shandong Provincial Key Laboratory of Optical Communication Science and Technology, School of Physical Science and Information Technology, Liaocheng University, Liaocheng 252059, China

\*corresponding author: [dihuang@hut.edu.cn](mailto:dihuang@hut.edu.cn); [liangjiaojiao@hut.edu.cn](mailto:liangjiaojiao@hut.edu.cn); [zhaoling9966@163.com](mailto:zhaoling9966@163.com) \_

## Experimental details

### Data collection and preprocessing

We collected a total of 433 sets of data in 90 articles on PC<sub>71</sub>BM based ternary organic solar cells from 2016 to 2021 in web of science. Each group of data collected includes HOMO and LUMO energy levels of donor, acceptor and the third component, as well as the corresponding J<sub>sc</sub> and PCE under different doping ratios (the doping ratio is the weight ratio), which are used to analyze its electronic characteristics and device efficiency. Moreover, experimentally estimated energy levels (HOMO(D) and LUMO(D) of donors, HOMO(A) and LUMO(A) of acceptors, and HOMO(T) and LUMO(T) of the third components) and the device performance at different doping ratios (T(%), V<sub>oc</sub>, J<sub>sc</sub>, FF and PCE) is gained from ref[1-90] and they are shown in Table S1. The best PCE distribution histogram of ternary OSCs is shown in Figure S1. The average value of the best PCE of all devices is only 8.99%, mainly distributed around 9%.

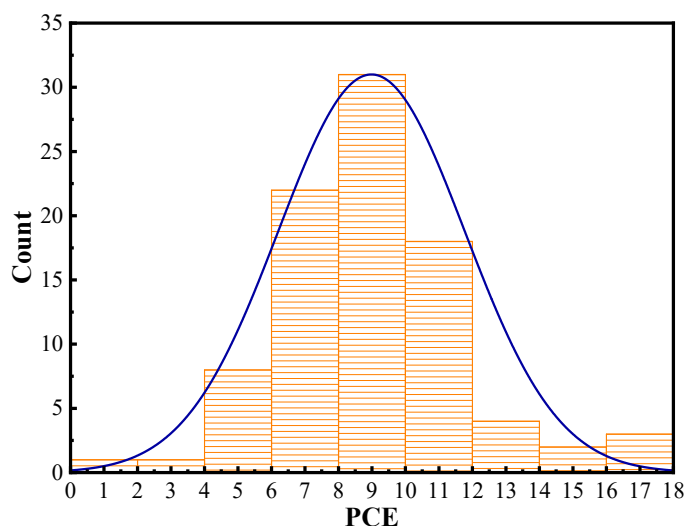

**Figure S1** Optimal PCE distribution histogram of the original dataset of reported PC71BM-based ternary OSCs

### Model establishment:

The algorithm network is all completed by python. After reading the data with pandas, the data set is divided into training set and test set, normalized and standardized. According to the characteristics of the data, the Scikit Learn class is called to initially obtain random forest (FR), K-nearest neighbors (KNN), and support vector machine (SVM) to establish the algorithm network model. Here each model is consists of input variables(HOMO(A) and LUMO(A) of the donor, HOMO(D) and LUMO(D) of the

acceptor, HOMO(T) and LUMO(T) of the third component, and doping ratio T(%)) and target variables ( $J_{sc}$  and PCE). We divide the data set based on 8:2, which means the training set with 80% of the data (347 groups) is applied for training to obtain the network model parameters of the three algorithms, and then we use the cross-validation method to evaluate the performance for the network model via the remaining 20% of the data (86 groups).

#### Model performance evaluation:

Using the coefficient of determination ( $R^2$ ), the root mean square error (RMSE), the mean absolute error (MAE), and the mean absolute percent error (MAPE) judge the pros and cons of the algorithm. The calculation formulas are shown in (1) (2) (3) and (4).

$$R^2 = \frac{\left[ \sum_{i=1}^n (x_i - \hat{x})(x'_i - \hat{x}') \right]}{\sum_{i=1}^n (x_i - \hat{x})^2 \cdot \sum_{i=1}^n (x'_i - \hat{x}')^2} \quad (1)$$

$$RMSE = \sqrt{\frac{\sum_{i=1}^n (x'_i - x_i)^2}{n}} \quad (2)$$

$$MAE = \frac{1}{n} \sum_{i=1}^n |x'_i - x_i| \quad (3)$$

$$MAPE = \frac{1}{n} \sum_{i=1}^n \frac{|x'_i - x_i|}{x_i} \quad (4)$$

where  $n$  is the total number of data;  $x_i$  and  $x'_i$  represent the original and predicted values, respectively;  $\hat{x}$  and  $\hat{x}'$  represent the average of the original and predicted values, respectively.

#### Material and solution preparation

SMPV1 and PTB7 were bought from 1-Material Company. Moreover, PTB7 has a ~200 kg/mol molecular weight and about 4 polydispersity. PC<sub>71</sub>BM was purchased by Nano-C. All of materials were applied without any purification. In order to dissolve three solar cell materials, chlorobenzene (CB, 99.8%) was used, which was purchased from Sigma Aldrich. The mixed solution for binary device was ready from dissolving the component organic materials with 20mg (8mg for PTB7 and 12mg for PC<sub>71</sub>BM) in 0.97mL of CB and 0.03mL DIO. For the ternary mixed solutions, SMPV1 was mixed by volume counted on the PTB7 volume. For example, a ternary mixed solution with 7.5wt% of SMVP1 was prepared by adding 15ul of SMVP1(16mg/ml) into the mixed solution containing 85ul of PTB7(16mg/ml) and 100ul of PC<sub>71</sub>BM(24mg/ml). The concentration of the blend solutions always remain 20mg/ml. The blend solutions were stirred at 60°C overnight and stored in Glove box with N<sub>2</sub>-filled for around 6 months.

#### Device fabrication

The glass substrates with 1.5cm×1.5cm is covered Indium tin oxide (ITO) with 1.5cm×1.5cm. It has the sheet resistance of 10 Ω/□ to be applied as the bottom electrode for devices. The ITO substrates were cleaned successively in ultrasonic bathes with containing deionized water and ethanol (each step for 20min), and then were dried by the N<sub>2</sub> gas before being applied. ZnO films were spun-coat at 5000 rpm

on the cleaned ITO substrates and dried for 20 min at 150°C on the hot plate to format an electron transport layer. Next, the substrates were transferred in a N<sub>2</sub>-Filled glove box, and then the mixed solutions were spin-coat with 1000 rpm and 120 second on the ZnO films. After drying for 30min in Petri dish, the substrates were transferred into the chamber. Finally, MoOx and Ag were continuously evaporated on the substrates via the patterned shadow masks. MoOx and Ag layer's thickness was 4 nm and 120 nm respectively. For the duration of the evaporation, the vacuum level was remained at  $\sim 7 \times 10^{-7}$  Torr. The deposition rate of MoOx was around 0.2 Å/s and the deposition rate of Ag was around 2 Å/s. The effective area (1.8 mm<sup>2</sup>) was determined by the vertical overlap of the top silver electrode and the bottom ITO anode; what's more, the area of the top Ag electrode was defined by the patterned shadow mask.

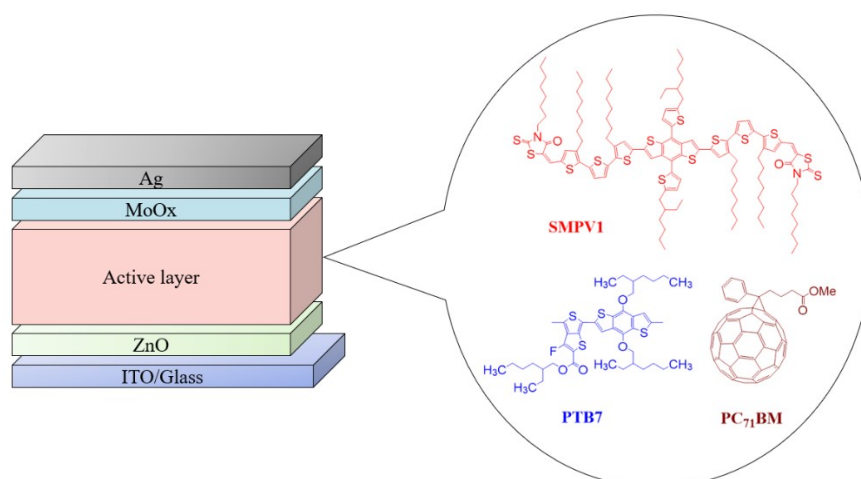

**Figure S2** The chemical structures of SMPV1, PTB7 and PC<sub>71</sub>BM and the structure diagram of devices.

### Device measurement

The OSCs' J-V characteristics were measured by Keithley 2400 source equipment unit with a simulated AM 1.5G spectrum of 100 mW/cm<sup>2</sup> power in glove box. The EQE measurements were tested by a PV Measurements QEX7 system in a N<sub>2</sub>-filled glove box.

### Characterization

The UV-vis absorption spectrum was performed on Varian Cary 3E UV-vis spectrophotometer. And the PL spectra were carried out by the Perkin Elmer LS-55 spectrophotometer. In addition, the TRPL decays were tested by a Fluo Time 200 time correlated single photon counting spectrometer (Picoquant Germany) including a micro-channel plate photomultiplier (Hamamatsu R3809, response for 25 ps), a PicoHarp analyzer with 300 time (Picoquant, Germany) and a pulsed solid state diode laser (Maitai Spectra Physics with 8 MHz repetition rate, pulse width 85 fs, and frequency doubled at 495 nm).

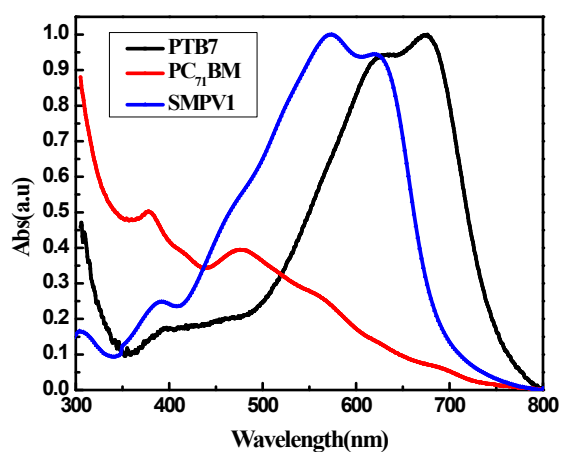

**Figure S3** Absorption spectra of pure SMPV1, PTB7 and PC<sub>71</sub>BM films.

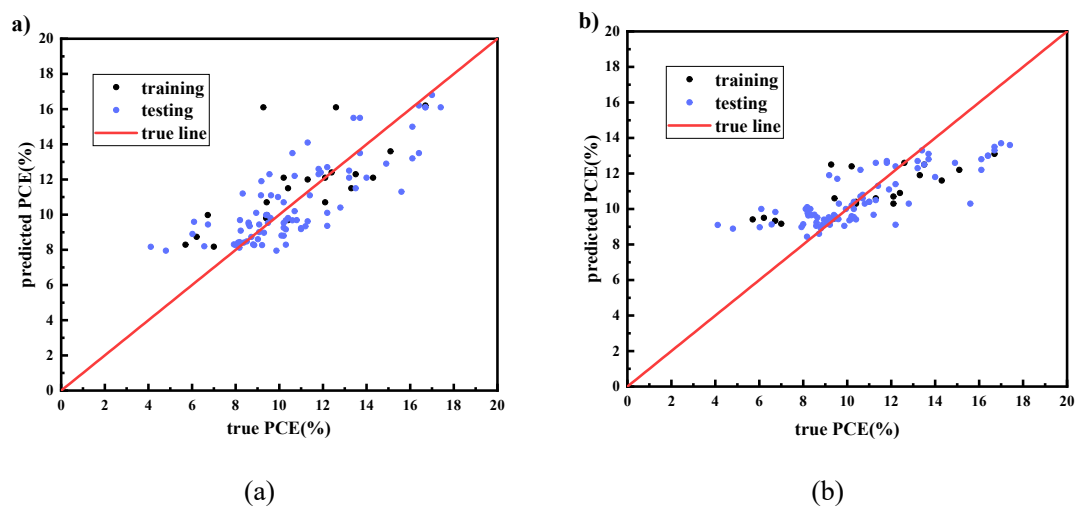

**Figure S4** The plots of the relationship between the true PCE and the predicted PCE predicted by (a) KNN and (b) SVM

| <b>Table S1 Experimentally Estimated Energy Levels (HOMO(D) and LUMO(D) of Donors, HOMO(A) and LUMO(A) of Acceptors, and HOMO(T) and LUMO(T) of the Third Components) and the Device performance at different doping ratios (T(%),Voc,Jsc,FF,and PCE)</b> |                     |                         |                 |                 |                 |                 |                 |                 |              |            |            |           |            |            |
|-----------------------------------------------------------------------------------------------------------------------------------------------------------------------------------------------------------------------------------------------------------|---------------------|-------------------------|-----------------|-----------------|-----------------|-----------------|-----------------|-----------------|--------------|------------|------------|-----------|------------|------------|
| <b>Donor</b>                                                                                                                                                                                                                                              | <b>Acceptor</b>     | <b>Third Components</b> | <b>HOMO (D)</b> | <b>LUMO (D)</b> | <b>HOMO (A)</b> | <b>LUMO (A)</b> | <b>HOMO (T)</b> | <b>LUMO (T)</b> | <b>T (%)</b> | <b>Voc</b> | <b>Jsc</b> | <b>FF</b> | <b>PCE</b> | <b>Ref</b> |
| DPP-2TPP                                                                                                                                                                                                                                                  | PC <sub>71</sub> BM | DR3TBDTTF               | -5.18           | -3.77           | -6              | -4              | -5.15           | -3.1            | 20           | 0.82       | 17.78      | 76.5      | 11.0       | 1          |
|                                                                                                                                                                                                                                                           |                     |                         | -5.18           | -3.77           | -6              | -4              | -5.15           | -3.1            | 0            | 0.8        | 16.35      | 71.1      | 9.1        |            |
|                                                                                                                                                                                                                                                           |                     |                         | -5.18           | -3.77           | -6              | -4              | -5.15           | -3.1            | 10           | 0.81       | 17.16      | 73.3      | 10.0       |            |
|                                                                                                                                                                                                                                                           |                     |                         | -5.18           | -3.77           | -6              | -4              | -5.15           | -3.1            | 30           | 0.83       | 17.41      | 71.6      | 10.1       |            |
| DR3                                                                                                                                                                                                                                                       | ICC6                | PC <sub>71</sub> BM     | -5.1            | -3.4            | -5.8            | -4.2            | -5.91           | -4.1            | 0            | 0.87       | 15.2       | 64        | 8.4        | 2          |
|                                                                                                                                                                                                                                                           |                     |                         | -5.1            | -3.4            | -5.8            | -4.2            | -5.91           | -4.1            | 28           | 0.87       | 16.3       | 72        | 10.4       |            |
| DR3                                                                                                                                                                                                                                                       | PC <sub>71</sub> BM | ICC6                    | -5.1            | -3.4            | -5.91           | -4.1            | -5.8            | -4.2            | 33           | 0.81       | 14.1       | 60        | 6.9        | 2          |
|                                                                                                                                                                                                                                                           |                     |                         | -5.1            | -3.4            | -5.91           | -4.1            | -5.8            | -4.2            | 0            | 0.88       | 13.2       | 72        | 8.2        |            |
| EP02                                                                                                                                                                                                                                                      | MPU3                | PC <sub>71</sub> BM     | -5.36           | -3.02           | -5.61           | -3.76           | -6.08           | -4.1            | 0            | 1.05       | 14.57      | 58        | 8.92       | 3          |
|                                                                                                                                                                                                                                                           |                     |                         | -5.36           | -3.02           | -5.61           | -3.76           | -6.08           | -4.1            | 33           | 0.94       | 16.12      | 63        | 9.62       |            |
|                                                                                                                                                                                                                                                           |                     |                         | -5.36           | -3.02           | -5.61           | -3.76           | -6.08           | -4.1            | 100          | 0.93       | 10.41      | 57        | 5.59       |            |
| LSC01                                                                                                                                                                                                                                                     | MPU3                | PC <sub>71</sub> BM     | -5.16           | -2.93           | -5.61           | -3.76           | -6.08           | -4.1            | 0            | 0.88       | 15.19      | 61        | 8.22       | 3          |
|                                                                                                                                                                                                                                                           |                     |                         | -5.16           | -2.93           | -5.61           | -3.76           | -6.08           | -4.1            | 33           | 0.83       | 16.82      | 65        | 9.16       |            |
|                                                                                                                                                                                                                                                           |                     |                         | -5.16           | -2.93           | -5.61           | -3.76           | -6.08           | -4.1            | 100          | 0.79       | 12.85      | 62        | 6.35       |            |
| PTB7-Th                                                                                                                                                                                                                                                   | PC <sub>71</sub> BM | FTR                     | -5.15           | -3.55           | -6.09           | -3.9            | -5.52           | -3.51           | 0            | 0.77       | 17.02      | 60.8      | 8          | 4          |
|                                                                                                                                                                                                                                                           |                     |                         | -5.15           | -3.55           | -6.09           | -3.9            | -5.52           | -3.51           | 5            | 0.77       | 17.24      | 61.6      | 8.2        |            |
|                                                                                                                                                                                                                                                           |                     |                         | -5.15           | -3.55           | -6.09           | -3.9            | -5.52           | -3.51           | 10           | 0.77       | 17.54      | 63.3      | 8.5        |            |
|                                                                                                                                                                                                                                                           |                     |                         | -5.15           | -3.55           | -6.09           | -3.9            | -5.52           | -3.51           | 15           | 0.768      | 19.15      | 64.2      | 9.4        |            |
|                                                                                                                                                                                                                                                           |                     |                         | -5.15           | -3.55           | -6.09           | -3.9            | -5.52           | -3.51           | 20           | 0.77       | 17.34      | 62        | 8.3        |            |
| PBDB-T                                                                                                                                                                                                                                                    | IDT-EDOT            | PC <sub>71</sub> BM     | -5.33           | -2.92           | -5.43           | -3.8            | -5.96           | -3.98           | 0            | 0.87       | 18.42      | 62.3      | 9.93       | 5          |

|                  |                     |                     |       |       |       |       |       |       |     |       |       |       |           |   |
|------------------|---------------------|---------------------|-------|-------|-------|-------|-------|-------|-----|-------|-------|-------|-----------|---|
|                  |                     |                     | -5.33 | -2.92 | -5.43 | -3.8  | -5.96 | -3.98 | 17  | 0.86  | 20.5  | 63.6  | 11.1      |   |
|                  |                     |                     | -5.33 | -2.92 | -5.43 | -3.8  | -5.96 | -3.98 | 33  | 0.86  | 20.61 | 63.4  | 11.1      |   |
|                  |                     |                     | -5.33 | -2.92 | -5.43 | -3.8  | -5.96 | -3.98 | 50  | 0.88  | 20.84 | 66.7  | 12.0      |   |
| PBDB-T           | PC71BM              | IDT-EDOT            | -5.33 | -2.92 | -5.96 | -3.98 | -5.43 | -3.8  | 0   | 0.83  | 13.33 | 69.08 | 7.63      | 5 |
|                  |                     |                     | -5.33 | -2.92 | -5.96 | -3.98 | -5.43 | -3.8  | 17  | 0.85  | 17.96 | 68    | 10.3      |   |
|                  |                     |                     | -5.33 | -2.92 | -5.96 | -3.98 | -5.43 | -3.8  | 33  | 0.87  | 19.57 | 67    | 11.3      |   |
| PBDB-T           | ITIC                | PC71BM              | -5.3  | -2.9  | -5.5  | -3.8  | -6    | -4    | 0   | 0.902 | 15.06 | 69    | 9.38      | 6 |
|                  |                     |                     | -5.3  | -2.9  | -5.5  | -3.8  | -6    | -4    | 20  | 0.892 | 15.98 | 71.7  | 10.2      |   |
|                  |                     |                     | -5.3  | -2.9  | -5.5  | -3.8  | -6    | -4    | 100 | 0.856 | 13.64 | 70.3  | 8.21      |   |
| PFBT4F-<br>BDT10 | PC <sub>71</sub> BM | IDIC                | -5.47 | -3.83 | -6.07 | -4.03 | -5.64 | -3.98 | 0   | 0.76  | 5.87  | 53.8  | 2.4       | 7 |
|                  |                     |                     | -5.47 | -3.83 | -6.07 | -4.03 | -5.64 | -3.98 | 25  | 0.76  | 17.54 | 65.5  | 8.72      |   |
|                  |                     |                     | -5.47 | -3.83 | -6.07 | -4.03 | -5.64 | -3.98 | 37. | 0.75  | 21.12 | 63.9  | 10.1      |   |
|                  |                     |                     | -5.47 | -3.83 | -6.07 | -4.03 | -5.64 | -3.98 | 50  | 0.76  | 19.76 | 64.3  | 9.53      |   |
| PFBT4F-<br>BDT10 | IDIC                | PC <sub>71</sub> BM | -5.47 | -3.83 | -5.64 | -3.98 | -6.07 | -4.03 | 0   | 0.79  | 13.56 | 65.1  | 6.97      | 7 |
|                  |                     |                     | -5.47 | -3.83 | -5.64 | -3.98 | -6.07 | -4.03 | 25  | 0.77  | 17.59 | 66.3  | 8.98      |   |
|                  |                     |                     | -5.47 | -3.83 | -5.64 | -3.98 | -6.07 | -4.03 | 37. | 0.77  | 17.8  | 68.2  | 9.27      |   |
| PM6              | BTP-BO-<br>4Cl      | PC <sub>71</sub> BM | -5.51 | -3.62 | -5.66 | -4.09 | -6    | -4    | 0   | 0.838 | 26.19 | 75.84 | 16.6<br>5 | 8 |
|                  |                     |                     | -5.51 | -3.62 | -5.66 | -4.09 | -6    | -4    | 8   | 0.847 | 26.44 | 77.65 | 17.3      |   |
|                  |                     |                     | -5.51 | -3.62 | -5.66 | -4.09 | -6    | -4    | 50  | 0.847 | 23.47 | 73.18 | 14.5      |   |
|                  |                     |                     | -5.51 | -3.62 | -5.66 | -4.09 | -6    | -4    | 100 | 0.911 | 12.5  | 73.22 | 8.34      |   |
| PM6              | Y6                  | PC <sub>71</sub> BM | -5.54 | -3.65 | -5.65 | -4.1  | -5.87 | -3.91 | 0   | 0.83  | 25.12 | 74.53 | 15.5      | 9 |

|          |                     |        |       |       |       |       |       |       |     |       |       |       |      |    |
|----------|---------------------|--------|-------|-------|-------|-------|-------|-------|-----|-------|-------|-------|------|----|
|          |                     |        | -5.54 | -3.65 | -5.65 | -4.1  | -5.87 | -3.91 | 8   | 0.837 | 26.12 | 76.5  | 16.7 |    |
| PPDT2FBT | PC <sub>71</sub> BM | IDT2BR | -5.45 | -3.69 | -6    | -4.1  | -5.52 | -3.87 | 0   | 0.79  | 14.75 | 70    | 8.16 | 10 |
|          |                     |        | -5.45 | -3.69 | -6    | -4.1  | -5.52 | -3.87 | 10  | 0.82  | 15.5  | 71    | 9.02 |    |
|          |                     |        | -5.45 | -3.69 | -6    | -4.1  | -5.52 | -3.87 | 20  | 0.84  | 14.88 | 69    | 8.62 |    |
|          |                     |        | -5.45 | -3.69 | -6    | -4.1  | -5.52 | -3.87 | 40  | 0.88  | 13.68 | 60    | 7.22 |    |
|          |                     |        | -5.45 | -3.69 | -6    | -4.1  | -5.52 | -3.87 | 60  | 0.91  | 10.23 | 42    | 3.91 |    |
|          |                     |        | -5.45 | -3.69 | -6    | -4.1  | -5.52 | -3.87 | 80  | 0.98  | 7.71  | 39    | 2.95 |    |
|          |                     |        | -5.45 | -3.69 | -6    | -4.1  | -5.52 | -3.87 | 100 | 1.11  | 8.4   | 55    | 5.16 |    |
| PTB7     | PC <sub>71</sub> BM | BT2TR  | -5.51 | -3.31 | -5.9  | -3.86 | -5.23 | -3.78 | 0   | 0.75  | 15.51 | 68.53 | 7.97 | 11 |
|          |                     |        | -5.51 | -3.31 | -5.9  | -3.86 | -5.23 | -3.78 | 5   | 0.74  | 16.47 | 68.99 | 8.41 |    |
|          |                     |        | -5.51 | -3.31 | -5.9  | -3.86 | -5.23 | -3.78 | 10  | 0.74  | 16.48 | 70.75 | 8.63 |    |
|          |                     |        | -5.51 | -3.31 | -5.9  | -3.86 | -5.23 | -3.78 | 15  | 0.74  | 17.55 | 70.92 | 9.21 |    |
|          |                     |        | -5.51 | -3.31 | -5.9  | -3.86 | -5.23 | -3.78 | 30  | 0.74  | 15.94 | 65.55 | 7.73 |    |
|          |                     |        | -5.51 | -3.31 | -5.9  | -3.86 | -5.23 | -3.78 | 50  | 0.73  | 15.13 | 62.64 | 6.92 |    |
| PTB7     | PC <sub>71</sub> BM | BT3TR  | -5.51 | -3.31 | -5.9  | -3.86 | -5.14 | -3.52 | 0   | 0.75  | 15.51 | 68.53 | 7.97 | 11 |
|          |                     |        | -5.51 | -3.31 | -5.9  | -3.86 | -5.14 | -3.52 | 5   | 0.75  | 16.57 | 70.68 | 8.78 |    |
|          |                     |        | -5.51 | -3.31 | -5.9  | -3.86 | -5.14 | -3.52 | 10  | 0.74  | 17.04 | 70.17 | 8.85 |    |
|          |                     |        | -5.51 | -3.31 | -5.9  | -3.86 | -5.14 | -3.52 | 15  | 0.75  | 15.99 | 69.77 | 8.26 |    |
|          |                     |        | -5.51 | -3.31 | -5.9  | -3.86 | -5.14 | -3.52 | 30  | 0.76  | 15.17 | 69.76 | 8.04 |    |
|          |                     |        | -5.51 | -3.31 | -5.9  | -3.86 | -5.14 | -3.52 | 50  | 0.76  | 14.21 | 62.71 | 6.77 |    |
| PTB7-Th  | PC <sub>71</sub> BM | C545T  | -5.24 | -3.62 | -6.1  | -3.9  | -5.54 | -2.8  | 0   | 0.78  | 17.72 | 65.29 | 8.98 | 12 |
|          |                     |        | -5.24 | -3.62 | -6.1  | -3.9  | -5.54 | -2.8  | 5   | 0.78  | 18.02 | 67.51 | 9.59 |    |
|          |                     |        | -5.24 | -3.62 | -6.1  | -3.9  | -5.54 | -2.8  | 10  | 0.79  | 20.01 | 68.07 | 10.5 |    |
|          |                     |        | -5.24 | -3.62 | -6.1  | -3.9  | -5.54 | -2.8  | 15  | 0.79  | 18.53 | 66.71 | 9.62 |    |

|             |                     |                     |       |       |       |       |       |       |     |       |       |       |       |    |
|-------------|---------------------|---------------------|-------|-------|-------|-------|-------|-------|-----|-------|-------|-------|-------|----|
|             |                     |                     | -5.24 | -3.62 | -6.1  | -3.9  | -5.54 | -2.8  | 20  | 0.79  | 17.51 | 66.69 | 9.06  |    |
| PTB7        | PC <sub>71</sub> BM | C545T               | -5.15 | -3.31 | -6.1  | -3.9  | -5.54 | -2.8  | 0   | 0.72  | 16.09 | 68.01 | 7.92  | 12 |
|             |                     |                     | -5.15 | -3.31 | -6.1  | -3.9  | -5.54 | -2.8  | 5   | 0.72  | 16.67 | 71.22 | 8.59  |    |
|             |                     |                     | -5.15 | -3.31 | -6.1  | -3.9  | -5.54 | -2.8  | 10  | 0.73  | 17.7  | 72.64 | 9.42  |    |
|             |                     |                     | -5.15 | -3.31 | -6.1  | -3.9  | -5.54 | -2.8  | 15  | 0.73  | 15.94 | 71.55 | 8.37  |    |
|             |                     |                     | -5.15 | -3.31 | -6.1  | -3.9  | -5.54 | -2.8  | 20  | 0.73  | 15.4  | 69.31 | 7.84  |    |
| PTB7-Th     | COi8DFIC            | PC <sub>71</sub> BM | -5.39 | -3.12 | -5.5  | -3.88 | -5.55 | -3.67 | 0   | 0.701 | 22.32 | 60    | 9.39  | 13 |
|             |                     |                     | -5.39 | -3.12 | -5.5  | -3.88 | -5.55 | -3.67 | 30  | 0.711 | 25.13 | 68    | 12.0  |    |
|             |                     |                     | -5.39 | -3.12 | -5.5  | -3.88 | -5.55 | -3.67 | 100 | 0.819 | 15.26 | 62    | 7.74  |    |
| TBFC150-BDD | BTP-4F              | PC <sub>71</sub> BM | -5.45 | -3.26 | -5.15 | -4.1  | -5.96 | -4    | 0   | 0.849 | 22.43 | 55.82 | 10.58 | 14 |
|             |                     |                     | -5.45 | -3.26 | -5.15 | -4.1  | -5.96 | -4    | 17  | 0.86  | 24.64 | 62.04 | 13.1  |    |
|             |                     |                     | -5.45 | -3.26 | -5.15 | -4.1  | -5.96 | -4    | 100 | 0.913 | 12.16 | 59.55 | 6.58  |    |
| PTQ10       | Y6                  | PC <sub>71</sub> BM | -5.54 | -2.98 | -5.65 | -4.1  | -6    | -4    | 0   | 0.851 | 24.64 | 71.67 | 15.0  | 15 |
|             |                     |                     | -5.54 | -2.98 | -5.65 | -4.1  | -6    | -4    | 14  | 0.85  | 25.32 | 74.69 | 16.0  |    |
|             |                     |                     | -5.54 | -2.98 | -5.65 | -4.1  | -6    | -4    | 25  | 0.847 | 25.12 | 71    | 15.1  |    |
|             |                     |                     | -5.54 | -2.98 | -5.65 | -4.1  | -6    | -4    | 100 | 0.94  | 8.32  | 55.12 | 4.31  |    |
| PTB7-Th     | PC71BM              | Coumarin-7          | -5.24 | -3.62 | -6.1  | -3.7  | -5.13 | -2.8  | 0   | 0.78  | 18.26 | 65.49 | 9.26  | 16 |
|             |                     |                     | -5.24 | -3.62 | -6.1  | -3.7  | -5.13 | -2.8  | 5   | 0.78  | 18.61 | 69.74 | 10.0  |    |
|             |                     |                     | -5.24 | -3.62 | -6.1  | -3.7  | -5.13 | -2.8  | 10  | 0.78  | 22.26 | 70.71 | 12.2  |    |
|             |                     |                     | -5.24 | -3.62 | -6.1  | -3.7  | -5.13 | -2.8  | 15  | 0.77  | 20.88 | 70.29 | 11.2  |    |
|             |                     |                     | -5.24 | -3.62 | -6.1  | -3.7  | -5.13 | -2.8  | 20  | 0.76  | 18.93 | 66.63 | 9.81  |    |
| PTB7-Th     | PC <sub>71</sub> BM | PffBT4T-2OD         | -5.25 | -3.2  | -6    | -4    | -5.38 | -2.83 | 0   | 0.79  | 18.2  | 71.4  | 10.31 | 17 |



|             |                     |                     |       |       |       |       |       |       |     |       |       |       |           |    |
|-------------|---------------------|---------------------|-------|-------|-------|-------|-------|-------|-----|-------|-------|-------|-----------|----|
|             |                     |                     | -5.25 | -3.2  | -6    | -4    | -5.38 | -2.83 | 5   | 0.78  | 18.3  | 73.7  | 10.6      |    |
|             |                     |                     | -5.25 | -3.2  | -6    | -4    | -5.38 | -2.83 | 10  | 0.78  | 18.6  | 75.7  | 11        |    |
|             |                     |                     | -5.25 | -3.2  | -6    | -4    | -5.38 | -2.83 | 15  | 0.78  | 18.5  | 74.8  | 10.8      |    |
|             |                     |                     | -5.25 | -3.2  | -6    | -4    | -5.38 | -2.83 | 20  | 0.77  | 18.4  | 73.9  | 10.5      |    |
| PTB7-Th     | PC <sub>71</sub> BM | PBDB-T              | -5.23 | -3.65 | -6    | -4.1  | -5.21 | -3.41 | 0   | 0.795 | 16.51 | 63.06 | 8.28      | 18 |
|             |                     |                     | -5.23 | -3.65 | -6    | -4.1  | -5.21 | -3.41 | 5   | 0.795 | 16.92 | 64    | 8.62      |    |
|             |                     |                     | -5.23 | -3.65 | -6    | -4.1  | -5.21 | -3.41 | 10  | 0.801 | 17.36 | 65.21 | 9.11      |    |
|             |                     |                     | -5.23 | -3.65 | -6    | -4.1  | -5.21 | -3.41 | 15  | 0.806 | 17.6  | 65.62 | 9.3       |    |
|             |                     |                     | -5.23 | -3.65 | -6    | -4.1  | -5.21 | -3.41 | 20  | 0.79  | 16.83 | 66.23 | 8.83      |    |
|             |                     |                     | -5.23 | -3.65 | -6    | -4.1  | -5.21 | -3.41 | 25  | 0.795 | 16.31 | 62.11 | 7.92      |    |
| PBDTNS-BDD  | Y6                  | PC <sub>71</sub> BM | -5.32 | -3.48 | -5.65 | -4.1  | -5.96 | -4    | 0   | 0.79  | 22.86 | 69.37 | 12.5<br>5 | 19 |
|             |                     |                     | -5.32 | -3.48 | -5.65 | -4.1  | -5.96 | -4    | 14  | 0.811 | 24.66 | 74.39 | 14.8      |    |
|             |                     |                     | -5.32 | -3.48 | -5.65 | -4.1  | -5.96 | -4    | 100 | 0.912 | 11.66 | 66.26 | 7.05      |    |
| PffBT4T-2OD | PC <sub>71</sub> BM | IDFBR               | -5.34 | -3.69 | -6    | -4    | -5.75 | -3.7  | 0   | 0.789 | 14.97 | 59.3  | 7.37      | 20 |
|             |                     |                     | -5.34 | -3.69 | -6    | -4    | -5.75 | -3.7  | 3   | 0.794 | 16.49 | 61.1  | 8.17      |    |
|             |                     |                     | -5.34 | -3.69 | -6    | -4    | -5.75 | -3.7  | 5   | 0.795 | 16.61 | 62.5  | 8.51      |    |
|             |                     |                     | -5.34 | -3.69 | -6    | -4    | -5.75 | -3.7  | 10  | 0.801 | 14.01 | 55.1  | 6.83      |    |
|             |                     |                     | -5.34 | -3.69 | -6    | -4    | -5.75 | -3.7  | 100 | 1.136 | 4     | 44.5  | 2.13      |    |
| PBT-OTT     | PC <sub>71</sub> BM | ITIC                | -5.56 | -3.67 | -6    | -4.15 | -5.64 | -4.04 | 0   | 0.83  | 13.3  | 58.5  | 6.74      | 21 |
|             |                     |                     | -5.56 | -3.67 | -6    | -4.15 | -5.64 | -4.04 | 10  | 0.86  | 13.9  | 63.6  | 7.92      |    |
|             |                     |                     | -5.56 | -3.67 | -6    | -4.15 | -5.64 | -4.04 | 20  | 0.87  | 14.8  | 63    | 8.18      |    |
|             |                     |                     | -5.56 | -3.67 | -6    | -4.15 | -5.64 | -4.04 | 30  | 0.87  | 14.5  | 55.5  | 7.24      |    |

|         |                     |                     |       |       |       |       |       |       |     |       |       |       |      |    |
|---------|---------------------|---------------------|-------|-------|-------|-------|-------|-------|-----|-------|-------|-------|------|----|
|         |                     |                     | -5.56 | -3.67 | -6    | -4.15 | -5.64 | -4.04 | 40  | 0.88  | 11.5  | 53.3  | 5.6  |    |
|         |                     |                     | -5.56 | -3.67 | -6    | -4.15 | -5.64 | -4.04 | 50  | 0.89  | 8.28  | 42.1  | 3.31 |    |
|         |                     |                     | -5.56 | -3.67 | -6    | -4.15 | -5.64 | -4.04 | 100 | 0.97  | 10.27 | 51    | 5.43 |    |
| PTB7-Th | PC <sub>71</sub> BM | IT-M                | -5.1  | -3.3  | -6.1  | -4.3  | -5.51 | -3.91 | 0   | 0.796 | 16.73 | 63.81 | 8.5  | 22 |
|         |                     |                     | -5.1  | -3.3  | -6.1  | -4.3  | -5.51 | -3.91 | 5   | 0.808 | 17.08 | 66.95 | 9.24 |    |
|         |                     |                     | -5.1  | -3.3  | -6.1  | -4.3  | -5.51 | -3.91 | 10  | 0.814 | 17.56 | 67.51 | 9.65 |    |
|         |                     |                     | -5.1  | -3.3  | -6.1  | -4.3  | -5.51 | -3.91 | 15  | 0.82  | 17.82 | 67.54 | 9.87 |    |
|         |                     |                     | -5.1  | -3.3  | -6.1  | -4.3  | -5.51 | -3.91 | 20  | 0.826 | 17.62 | 63.94 | 9.31 |    |
|         |                     |                     | -5.1  | -3.3  | -6.1  | -4.3  | -5.51 | -3.91 | 25  | 0.832 | 17.29 | 60.55 | 8.71 |    |
| BTR     | PC <sub>71</sub> BM | BDT-OH              | -5.36 | -3.39 | -6.11 | -4.3  | -5.49 | -3.45 | 0   | 0.93  | 13.95 | 69.6  | 9.05 | 23 |
|         |                     |                     | -5.36 | -3.39 | -6.11 | -4.3  | -5.49 | -3.45 | 20  | 0.93  | 14.62 | 74.2  | 10.1 |    |
|         |                     |                     | -5.36 | -3.39 | -6.11 | -4.3  | -5.49 | -3.45 | 100 | 0.9   | 13.56 | 65.3  | 8    |    |
| PBDB-T  | PC <sub>71</sub> BM | ITDCN               | -5.41 | -3.53 | -5.97 | -3.98 | -5.52 | -3.7  | 0   | 0.8   | 12.13 | 54.99 | 5.34 | 24 |
|         |                     |                     | -5.41 | -3.53 | -5.97 | -3.98 | -5.52 | -3.7  | 5   | 0.83  | 11.76 | 58.89 | 5.75 |    |
|         |                     |                     | -5.41 | -3.53 | -5.97 | -3.98 | -5.52 | -3.7  | 10  | 0.82  | 11.62 | 62.54 | 5.96 |    |
|         |                     |                     | -5.41 | -3.53 | -5.97 | -3.98 | -5.52 | -3.7  | 15  | 0.83  | 12.57 | 62.93 | 6.56 |    |
|         |                     |                     | -5.41 | -3.53 | -5.97 | -3.98 | -5.52 | -3.7  | 20  | 0.82  | 10.22 | 65.72 | 5.51 |    |
|         |                     |                     | -5.41 | -3.53 | -5.97 | -3.98 | -5.52 | -3.7  | 30  | 0.84  | 9.35  | 66.05 | 5.19 |    |
| PBT1-C  | IT-2F               | PC <sub>71</sub> BM | -5.42 | -3.41 | -5.67 | -4.02 | -5.92 | -3.9  | 0   | 0.879 | 17.28 | 72.7  | 11.0 | 25 |
|         |                     |                     | -5.42 | -3.41 | -5.67 | -4.02 | -5.92 | -3.9  | 9   | 0.882 | 17.74 | 75.7  | 11.8 |    |
|         |                     |                     | -5.42 | -3.41 | -5.67 | -4.02 | -5.92 | -3.9  | 17  | 0.892 | 18.19 | 75.1  | 12.1 |    |
|         |                     |                     | -5.42 | -3.41 | -5.67 | -4.02 | -5.92 | -3.9  | 23  | 0.893 | 18.1  | 74.1  | 11.9 |    |
|         |                     |                     | -5.42 | -3.41 | -5.67 | -4.02 | -5.92 | -3.9  | 29  | 0.901 | 17.76 | 73.2  | 11.7 |    |
|         |                     |                     | -5.42 | -3.41 | -5.67 | -4.02 | -5.92 | -3.9  | 38  | 0.898 | 17.69 | 73.5  | 11.6 |    |

|          |                     |                     |       |       |       |       |       |       |     |       |       |       |      |    |
|----------|---------------------|---------------------|-------|-------|-------|-------|-------|-------|-----|-------|-------|-------|------|----|
|          |                     |                     | -5.42 | -3.41 | -5.67 | -4.02 | -5.92 | -3.9  | 50  | 0.893 | 17.64 | 71.3  | 11.2 |    |
|          |                     |                     | -5.42 | -3.41 | -5.67 | -4.02 | -5.92 | -3.9  | 100 | 0.914 | 12.28 | 78    | 8.75 |    |
| FG1      | MPU4                | PC <sub>71</sub> BM | -5.35 | -3.62 | -5.65 | -3.96 | -6.1  | -4.1  | 0   | 0.97  | 19.54 | 59    | 11.1 | 26 |
|          |                     |                     | -5.35 | -3.62 | -5.65 | -3.96 | -6.1  | -4.1  | 25  | 0.89  | 21.91 | 68    | 13.2 |    |
|          |                     |                     | -5.35 | -3.62 | -5.65 | -3.96 | -6.1  | -4.1  | 100 | 0.84  | 12.5  | 63    | 6.62 |    |
| PM6      | IT-4F               | PC <sub>71</sub> BM | -5.42 | -3.61 | -5.61 | -4.08 | -5.82 | -3.94 | 0   | 0.851 | 20.62 | 74.7  | 13.1 | 27 |
|          |                     |                     | -5.42 | -3.61 | -5.61 | -4.08 | -5.82 | -3.94 | 9   | 0.849 | 21.48 | 75.29 | 13.7 |    |
| PM6      | BTP-4Cl             | PC <sub>71</sub> BM | -5.42 | -3.61 | -5.64 | -4.1  | -5.82 | -3.94 | 0   | 0.865 | 25.26 | 71.4  | 15.6 | 27 |
|          |                     |                     | -5.42 | -3.61 | -5.64 | -4.1  | -5.82 | -3.94 | 9   | 0.866 | 25.57 | 73.84 | 16.3 |    |
| PTB7-Th  | PC <sub>71</sub> BM | BDTTBO-BT           | -5.22 | -3.64 | -6    | -4    | -5.36 | -3.55 | 0   | 0.78  | 17.5  | 66    | 9.2  | 28 |
|          |                     |                     | -5.22 | -3.64 | -6    | -4    | -5.36 | -3.55 | 10  | 0.79  | 19.14 | 67.7  | 10.4 |    |
|          |                     |                     | -5.22 | -3.64 | -6    | -4    | -5.36 | -3.55 | 100 | 0.8   | 4.33  | 37.1  | 1.3  |    |
| PTB7-Th  | PC <sub>71</sub> BM | BDTTBO-BzT          | -5.22 | -3.64 | -6    | -4    | -5.47 | -3.52 | 0   | 0.78  | 17.5  | 66    | 9.2  | 28 |
|          |                     |                     | -5.22 | -3.64 | -6    | -4    | -5.47 | -3.52 | 10  | 0.8   | 18.03 | 64.7  | 9.4  |    |
|          |                     |                     | -5.22 | -3.64 | -6    | -4    | -5.47 | -3.52 | 100 | 0.83  | 9.81  | 42.4  | 3.8  |    |
| PTB7-Th  | PC <sub>71</sub> BM | BDTTBO-TT           | -5.22 | -3.64 | -6    | -4    | -5.41 | -3.54 | 0   | 0.78  | 17.5  | 66    | 9.2  | 28 |
|          |                     |                     | -5.22 | -3.64 | -6    | -4    | -5.41 | -3.54 | 10  | 0.78  | 17.75 | 67.5  | 9.6  |    |
|          |                     |                     | -5.22 | -3.64 | -6    | -4    | -5.41 | -3.54 | 100 | 0.79  | 10.36 | 51.3  | 4.4  |    |
| MV72     | PC <sub>71</sub> BM | MV71                | -5.29 | -3.67 | -6    | -4    | -5.24 | -3.55 | 0   | 0.92  | 11.25 | 39    | 4.03 | 29 |
|          |                     |                     | -5.29 | -3.67 | -6    | -4    | -5.24 | -3.55 | 20  | 0.89  | 13.02 | 58    | 6.72 |    |
| DR3TSBDT | Y6                  | PC <sub>71</sub> BM | -5.07 | -3.3  | -5.65 | -4.1  | -6    | -4    | 0   | 0.879 | 21.67 | 55.21 | 10.5 | 30 |
|          |                     |                     | -5.07 | -3.3  | -5.65 | -4.1  | -6    | -4    | 10  | 0.875 | 23    | 58.09 | 11.6 |    |
|          |                     |                     | -5.07 | -3.3  | -5.65 | -4.1  | -6    | -4    | 30  | 0.87  | 22.47 | 64.72 | 12.6 |    |

|            |                     |                     |       |       |       |       |       |       |     |       |       |       |      |    |
|------------|---------------------|---------------------|-------|-------|-------|-------|-------|-------|-----|-------|-------|-------|------|----|
|            |                     |                     | -5.07 | -3.3  | -5.65 | -4.1  | -6    | -4    | 40  | 0.858 | 22.19 | 67.27 | 12.8 |    |
|            |                     |                     | -5.07 | -3.3  | -5.65 | -4.1  | -6    | -4    | 50  | 0.852 | 21.43 | 69.19 | 12.6 |    |
|            |                     |                     | -5.07 | -3.3  | -5.65 | -4.1  | -6    | -4    | 70  | 0.849 | 18.4  | 67.11 | 10.5 |    |
|            |                     |                     | -5.07 | -3.3  | -5.65 | -4.1  | -6    | -4    | 100 | 0.936 | 12.04 | 65.39 | 7.4  |    |
| PTB7-Th    | IEICO-4F            | PC <sub>71</sub> BM | -5.24 | -3.36 | -5.44 | -4.19 | -5.96 | -3.98 | 0   | 0.73  | 21.3  | 60    | 9.44 | 31 |
|            |                     |                     | -5.24 | -3.36 | -5.44 | -4.19 | -5.96 | -3.98 | 10  | 0.74  | 22.64 | 63    | 10.5 |    |
|            |                     |                     | -5.24 | -3.36 | -5.44 | -4.19 | -5.96 | -3.98 | 20  | 0.74  | 23.14 | 60    | 10.2 |    |
|            |                     |                     | -5.24 | -3.36 | -5.44 | -4.19 | -5.96 | -3.98 | 30  | 0.74  | 21.9  | 58    | 9.36 |    |
|            |                     |                     | -5.24 | -3.36 | -5.44 | -4.19 | -5.96 | -3.98 | 50  | 0.76  | 20.91 | 51    | 8.04 |    |
| VC7        | IT-4F               | PC <sub>71</sub> BM | -5.3  | -3.9  | -5.67 | -4.14 | -6.1  | -4.1  | 0   | 0.84  | 21.94 | 63    | 11.6 | 32 |
|            |                     |                     | -5.3  | -3.9  | -5.67 | -4.14 | -6.1  | -4.1  | 25  | 0.87  | 23.74 | 73    | 15.0 |    |
|            |                     |                     | -5.3  | -3.9  | -5.67 | -4.14 | -6.1  | -4.1  | 100 | 0.89  | 15.98 | 66    | 9.39 |    |
| PCDTBT     | PC <sub>71</sub> BM | ITIC                | -5.5  | -3.6  | -5.9  | -3.9  | -5.5  | -3.8  | 0   | 0.875 | 12.02 | 58.1  | 6.11 | 33 |
|            |                     |                     | -5.5  | -3.6  | -5.9  | -3.9  | -5.5  | -3.8  | 20  | 0.906 | 12.5  | 54.9  | 6.21 |    |
|            |                     |                     | -5.5  | -3.6  | -5.9  | -3.9  | -5.5  | -3.8  | 25  | 0.907 | 11.73 | 49.4  | 5.25 |    |
| PTB7-Th    | Y6                  | PC <sub>71</sub> BM | -5.22 | -3.64 | -5.65 | -4.1  | -5.96 | -3.98 | 0   | 0.67  | 20.16 | 56.77 | 7.71 | 34 |
|            |                     |                     | -5.22 | -3.64 | -5.65 | -4.1  | -5.96 | -3.98 | 17  | 0.67  | 24.68 | 58.02 | 9.55 |    |
|            |                     |                     | -5.22 | -3.64 | -5.65 | -4.1  | -5.96 | -3.98 | 100 | 0.82  | 13.92 | 58.8  | 6.67 |    |
| PBDTTPD-HT | PC <sub>71</sub> BM | DRCN5T              | -5.36 | -3.5  | -6.02 | -4.15 | -5.5  | -3.9  | 0   | 0.869 | 12.4  | 71.4  | 7.72 | 35 |
|            |                     |                     | -5.36 | -3.5  | -6.02 | -4.15 | -5.5  | -3.9  | 17  | 0.929 | 13    | 74.9  | 9.08 |    |
| PM6        | Y6                  | PC <sub>71</sub> BM | -5.5  | -3.56 | -5.7  | -4.1  | -5.92 | -3.9  | 0   | 0.845 | 24.89 | 74.37 | 15.7 | 36 |
|            |                     |                     | -5.5  | -3.56 | -5.7  | -4.1  | -5.92 | -3.9  | 8   | 0.85  | 25.36 | 75.66 | 16.3 |    |
|            |                     |                     | -5.5  | -3.56 | -5.7  | -4.1  | -5.92 | -3.9  | 12. | 0.85  | 25.8  | 74.66 | 16.3 |    |

|               |                     |                     |       |       |       |       |       |       |     |       |       |       |           |    |
|---------------|---------------------|---------------------|-------|-------|-------|-------|-------|-------|-----|-------|-------|-------|-----------|----|
|               |                     |                     | -5.5  | -3.56 | -5.7  | -4.1  | -5.92 | -3.9  | 17  | 0.85  | 25.7  | 76.35 | 16.6      |    |
|               |                     |                     | -5.5  | -3.56 | -5.7  | -4.1  | -5.92 | -3.9  | 25  | 0.853 | 25.05 | 75.15 | 16.0      |    |
|               |                     |                     | -5.5  | -3.56 | -5.7  | -4.1  | -5.92 | -3.9  | 42  | 0.865 | 23.94 | 73.85 | 15.3      |    |
|               |                     |                     | -5.5  | -3.56 | -5.7  | -4.1  | -5.92 | -3.9  | 67  | 0.876 | 19.24 | 49.74 | 8.39      |    |
|               |                     |                     | -5.5  | -3.56 | -5.7  | -4.1  | -5.92 | -3.9  | 100 | 0.965 | 11.56 | 53.9  | 6.01      |    |
| P3HT          | PC <sub>71</sub> BM | 2DPP-BDT            | -4.9  | -3    | -6    | -4    | -5    | -3.4  | 0   | 0.59  | 8.45  | 65    | 3.23      | 37 |
|               |                     |                     | -4.9  | -3    | -6    | -4    | -5    | -3.4  | 20  | 0.61  | 11.88 | 56.7  | 4.11      |    |
|               |                     |                     | -4.9  | -3    | -6    | -4    | -5    | -3.4  | 100 | 0.8   | 2.45  | 57.7  | 1.14      |    |
| PFBBDT-8tfTPD | IT-4F               | PC <sub>71</sub> BM | -5.33 | -3.43 | -5.71 | -4.18 | -6    | -4.12 | 0   | 0.89  | 19.91 | 72    | 12.8<br>1 | 38 |
|               |                     |                     | -5.33 | -3.43 | -5.71 | -4.18 | -6    | -4.12 | 15  | 0.9   | 20.82 | 73    | 13.6      |    |
| PFBBDT-8tfTPD | Y6                  | PC <sub>71</sub> BM | -5.33 | -3.43 | -5.65 | -4.29 | -6    | -4.12 | 0   | 0.84  | 24.99 | 72    | 15.0<br>5 | 38 |
|               |                     |                     | -5.33 | -3.43 | -5.65 | -4.29 | -6    | -4.12 | 15  | 0.85  | 25.96 | 74    | 16.4      |    |
| PM6           | FCTT-FIC            | PC <sub>71</sub> BM | -5.47 | -3.67 | -5.56 | -4.03 | -6    | -3.9  | 0   | 0.9   | 19.49 | 69.73 | 12.2      | 39 |
|               |                     |                     | -5.47 | -3.67 | -5.56 | -4.03 | -6    | -3.9  | 33  | 0.92  | 19.86 | 73.2  | 13.3      |    |
|               |                     |                     | -5.47 | -3.67 | -5.56 | -4.03 | -6    | -3.9  | 50  | 0.92  | 18.48 | 72.71 | 12.3      |    |
|               |                     |                     | -5.47 | -3.67 | -5.56 | -4.03 | -6    | -3.9  | 60  | 0.92  | 17.83 | 71.48 | 11.7      |    |
| PBDB-T        | TC-FIC              | PC <sub>71</sub> BM | -5.36 | -3.54 | -5.42 | -4    | -6    | -3.9  | 0   | 0.9   | 21.87 | 58.7  | 11.5      | 40 |
|               |                     |                     | -5.36 | -3.54 | -5.42 | -4    | -6    | -3.9  | 33  | 0.88  | 23.7  | 64.2  | 13.3      |    |
|               |                     |                     | -5.36 | -3.54 | -5.42 | -4    | -6    | -3.9  | 50  | 0.88  | 23.8  | 64.4  | 13.4      |    |
|               |                     |                     | -5.36 | -3.54 | -5.42 | -4    | -6    | -3.9  | 60  | 0.88  | 23.78 | 63.9  | 13.3      |    |
| PTB7-Th       | PC <sub>71</sub> BM | BTTCN               | -5.12 | -3.6  | -6.1  | -3.9  | -5.77 | -3.68 | 0   | 0.804 | 15.68 | 67.7  | 8.53      | 41 |
|               |                     |                     | -5.12 | -3.6  | -6.1  | -3.9  | -5.77 | -3.68 | 3   | 0.804 | 17.15 | 68.4  | 9.43      |    |

|           |                     |                     |       |       |       |       |       |       |     |       |       |       |      |    |
|-----------|---------------------|---------------------|-------|-------|-------|-------|-------|-------|-----|-------|-------|-------|------|----|
|           |                     |                     | -5.12 | -3.6  | -6.1  | -3.9  | -5.77 | -3.68 | 6   | 0.807 | 16.39 | 65.9  | 8.72 |    |
| DRCN5T    | PC <sub>71</sub> BM | PBDB-T              | -5.32 | -3.77 | -6    | -4    | -5.28 | -3.48 | 0   | 0.94  | 14.06 | 58.56 | 7.74 | 42 |
|           |                     |                     | -5.32 | -3.77 | -6    | -4    | -5.28 | -3.48 | 10  | 0.92  | 15.64 | 63.59 | 9.15 |    |
|           |                     |                     | -5.32 | -3.77 | -6    | -4    | -5.28 | -3.48 | 20  | 0.9   | 15.98 | 65.72 | 9.45 |    |
|           |                     |                     | -5.32 | -3.77 | -6    | -4    | -5.28 | -3.48 | 30  | 0.9   | 15.15 | 63.37 | 8.64 |    |
|           |                     |                     | -5.32 | -3.77 | -6    | -4    | -5.28 | -3.48 | 40  | 0.89  | 14.66 | 59.02 | 7.7  |    |
|           |                     |                     | -5.32 | -3.77 | -6    | -4    | -5.28 | -3.48 | 100 | 0.85  | 13.16 | 67.94 | 7.6  |    |
| PMTT56    | IT-2F               | PC <sub>71</sub> BM | -5.39 | -3.4  | -5.52 | -3.96 | -5.94 | -3.98 | 0   | 0.945 | 18.67 | 71.4  | 12.6 | 43 |
|           |                     |                     | -5.39 | -3.4  | -5.52 | -3.96 | -5.94 | -3.98 | 25  | 0.932 | 19.75 | 71.4  | 13.2 |    |
| PBDB-T-2F | Y6                  | PC <sub>71</sub> BM | -5.45 | -3.65 | -5.6  | -4.3  | -6.1  | -3.8  | 0   | 0.84  | 25.9  | 73    | 15.8 | 44 |
|           |                     |                     | -5.45 | -3.65 | -5.6  | -4.3  | -6.1  | -3.8  | 17  | 0.84  | 26    | 78    | 17   |    |
| PBDB-T    | IPIC-4Cl            | PC <sub>71</sub> BM | -5.33 | -3.29 | -5.51 | -3.95 | -6.1  | -4    | 0   | 0.813 | 22.2  | 74    | 13.4 | 45 |
|           |                     |                     | -5.33 | -3.29 | -5.51 | -3.95 | -6.1  | -4    | 9   | 0.823 | 22.6  | 73.2  | 13.6 |    |
|           |                     |                     | -5.33 | -3.29 | -5.51 | -3.95 | -6.1  | -4    | 23  | 0.822 | 23.3  | 74.6  | 14.3 |    |
|           |                     |                     | -5.33 | -3.29 | -5.51 | -3.95 | -6.1  | -4    | 33  | 0.822 | 20.4  | 72.3  | 12.1 |    |
| DR3TBDTT  | PC71BM              | PTB7-Th             | -5.02 | -3.27 | -6.1  | -3.9  | -5.24 | -3.62 | 0   | 0.834 | 11.89 | 44.4  | 4.4  | 46 |
|           |                     |                     | -5.02 | -3.27 | -6.1  | -3.9  | -5.24 | -3.62 | 3   | 0.835 | 10.13 | 59.9  | 5.1  |    |
|           |                     |                     | -5.02 | -3.27 | -6.1  | -3.9  | -5.24 | -3.62 | 7   | 0.824 | 10.86 | 60.5  | 5.4  |    |
|           |                     |                     | -5.02 | -3.27 | -6.1  | -3.9  | -5.24 | -3.62 | 10  | 0.82  | 11.38 | 61.5  | 5.7  |    |
|           |                     |                     | -5.02 | -3.27 | -6.1  | -3.9  | -5.24 | -3.62 | 25  | 0.821 | 10.12 | 45.4  | 3.8  |    |
|           |                     |                     | -5.02 | -3.27 | -6.1  | -3.9  | -5.24 | -3.62 | 50  | 0.823 | 5.41  | 38.6  | 1.7  |    |
|           |                     |                     | -5.02 | -3.27 | -6.1  | -3.9  | -5.24 | -3.62 | 100 | 0.826 | 4.74  | 33.1  | 1.3  |    |
| DTS       | PC <sub>71</sub> BM | SIDT                | -5.12 | -3.34 | -6.1  | -4.3  | -5.21 | -3.36 | 0   | 0.773 | 13.95 | 64    | 6.9  | 47 |
|           |                     |                     | -5.12 | -3.34 | -6.1  | -4.3  | -5.21 | -3.36 | 20  | 0.8   | 14.36 | 65.3  | 7.5  |    |

|         |                     |                     |       |       |       |       |       |       |     |       |       |       |      |    |
|---------|---------------------|---------------------|-------|-------|-------|-------|-------|-------|-----|-------|-------|-------|------|----|
|         |                     |                     | -5.12 | -3.34 | -6.1  | -4.3  | -5.21 | -3.36 | 30  | 0.812 | 14.68 | 66.3  | 7.9  |    |
|         |                     |                     | -5.12 | -3.34 | -6.1  | -4.3  | -5.21 | -3.36 | 40  | 0.827 | 14.82 | 55.9  | 8.2  |    |
|         |                     |                     | -5.12 | -3.34 | -6.1  | -4.3  | -5.21 | -3.36 | 50  | 0.842 | 15.41 | 67.5  | 8.8  |    |
|         |                     |                     | -5.12 | -3.34 | -6.1  | -4.3  | -5.21 | -3.36 | 60  | 0.855 | 14.42 | 65.7  | 8.1  |    |
|         |                     |                     | -5.12 | -3.34 | -6.1  | -4.3  | -5.21 | -3.36 | 70  | 0.869 | 12.65 | 65.5  | 7.2  |    |
|         |                     |                     | -5.12 | -3.34 | -6.1  | -4.3  | -5.21 | -3.36 | 100 | 0.911 | 10.72 | 65.5  | 6.4  |    |
| CSO1    | MPU3                | PC <sub>71</sub> BM | -5.32 | -3.6  | -5.61 | -3.74 | -6    | -4    | 0   | 1.07  | 13.04 | 56    | 7.81 | 48 |
|         |                     |                     | -5.32 | -3.6  | -5.61 | -3.74 | -6    | -4    | 25  | 0.97  | 16.27 | 63    | 9.94 |    |
|         |                     |                     | -5.32 | -3.6  | -5.61 | -3.74 | -6    | -4    | 100 | 0.79  | 10.48 | 58    | 4.8  |    |
| P3TCO-1 | ITIC                | PC <sub>71</sub> BM | -5.39 | -3.17 | -5.51 | -3.78 | -5.96 | -3.98 | 0   | 0.943 | 16.96 | 62.82 | 10.0 | 49 |
|         |                     |                     | -5.39 | -3.17 | -5.51 | -3.78 | -5.96 | -3.98 | 17  | 0.939 | 18.05 | 66.67 | 11.3 |    |
|         |                     |                     | -5.39 | -3.17 | -5.51 | -3.78 | -5.96 | -3.98 | 100 | 0.935 | 11.98 | 58.65 | 6.57 |    |
| PBDB-T  | PC <sub>71</sub> BM | BDTC-4Cl            | -5.26 | -3.63 | -6    | -4.19 | -5.35 | -3.75 | 0   | 0.847 | 13.21 | 72.6  | 8.12 | 50 |
|         |                     |                     | -5.26 | -3.63 | -6    | -4.19 | -5.35 | -3.75 | 50  | 0.856 | 21.19 | 67.2  | 12.1 |    |
|         |                     |                     | -5.26 | -3.63 | -6    | -4.19 | -5.35 | -3.75 | 100 | 0.864 | 18.56 | 59.5  | 9.54 |    |
| PBDB-T  | DTFT9-FIC           | PC <sub>71</sub> BM | -5.36 | -3.54 | -5.49 | -4.01 | -6    | -3.9  | 0   | 0.86  | 19.01 | 58.61 | 9.58 | 51 |
|         |                     |                     | -5.36 | -3.54 | -5.49 | -4.01 | -6    | -3.9  | 25  | 0.88  | 20.58 | 60.74 | 11   |    |
|         |                     |                     | -5.36 | -3.54 | -5.49 | -4.01 | -6    | -3.9  | 40  | 0.88  | 20.59 | 65.27 | 11.8 |    |
|         |                     |                     | -5.36 | -3.54 | -5.49 | -4.01 | -6    | -3.9  | 50  | 0.86  | 19.62 | 66.3  | 11.1 |    |
| PTB7    | PC <sub>71</sub> BM | EP-PDI              | -5.15 | -3.31 | -6.1  | -4.2  | -6.1  | -3.8  | 0   | 0.68  | 14.2  | 52.6  | 5.35 | 52 |
|         |                     |                     | -5.15 | -3.31 | -6.1  | -4.2  | -6.1  | -3.8  | 10  | 0.7   | 14.8  | 54.1  | 5.79 |    |
|         |                     |                     | -5.15 | -3.31 | -6.1  | -4.2  | -6.1  | -3.8  | 20  | 0.71  | 15.3  | 55.7  | 6.33 |    |
|         |                     |                     | -5.15 | -3.31 | -6.1  | -4.2  | -6.1  | -3.8  | 30  | 0.72  | 17.5  | 58.2  | 7.33 |    |

|         |                     |                     |       |       |       |       |       |       |     |       |       |       |      |    |
|---------|---------------------|---------------------|-------|-------|-------|-------|-------|-------|-----|-------|-------|-------|------|----|
|         |                     |                     | -5.15 | -3.31 | -6.1  | -4.2  | -6.1  | -3.8  | 40  | 0.72  | 19.3  | 59.2  | 8.23 |    |
|         |                     |                     | -5.15 | -3.31 | -6.1  | -4.2  | -6.1  | -3.8  | 50  | 0.72  | 18.1  | 54.7  | 7.14 |    |
| PTBTz-2 | ITIC                | PC <sub>71</sub> BM | -5.48 | -3.52 | -5.63 | -3.97 | -6    | -3.9  | 0   | 0.89  | 19.8  | 59.05 | 10.4 | 53 |
|         |                     |                     | -5.48 | -3.52 | -5.63 | -3.97 | -6    | -3.9  | 20  | 0.9   | 20.04 | 59.69 | 10.7 |    |
|         |                     |                     | -5.48 | -3.52 | -5.63 | -3.97 | -6    | -3.9  | 35  | 0.89  | 20.75 | 60.94 | 11.2 |    |
|         |                     |                     | -5.48 | -3.52 | -5.63 | -3.97 | -6    | -3.9  | 50  | 0.88  | 19.17 | 57.53 | 9.68 |    |
| PTB7    | PC <sub>71</sub> BM | BTA2                | -5.51 | -3.3  | -6    | -4    | -5.41 | -3.38 | 0   | 0.73  | 15.3  | 65.25 | 7.2  | 54 |
|         |                     |                     | -5.51 | -3.3  | -6    | -4    | -5.41 | -3.38 | 10  | 0.74  | 16.7  | 64.14 | 8    |    |
| PBDB-TF | HF-PCIC             | PC71BM              | -5.48 | -3.64 | -5.53 | -3.83 | -5.54 | -3.87 | 0   | 0.89  | 17.24 | 70.98 | 10.9 | 55 |
|         |                     |                     | -5.48 | -3.64 | -5.53 | -3.83 | -5.54 | -3.87 | 15  | 0.9   | 18.1  | 70.81 | 11.5 |    |
|         |                     |                     | -5.48 | -3.64 | -5.53 | -3.83 | -5.54 | -3.87 | 30  | 0.89  | 19.29 | 70.18 | 12.3 |    |
| PBDB-T  | IDTC-4Cl            | PC <sub>71</sub> BM | -5.26 | 3.63  | -5.5  | -3.79 | -6    | -4.19 | 0   | 0.822 | 19.19 | 60.2  | 9.5  | 56 |
|         |                     |                     | -5.26 | 3.63  | -5.5  | -3.79 | -6    | -4.19 | 20  | 0.829 | 19.14 | 65.6  | 10.4 |    |
| PTB7-Th | PC <sub>71</sub> BM | P8TT                | -5    | -3.4  | -5.8  | -4    | -5.29 | -3.31 | 0   | 0.795 | 16.67 | 63.7  | 8.44 | 57 |
|         |                     |                     | -5    | -3.4  | -5.8  | -4    | -5.29 | -3.31 | 6   | 0.811 | 16.81 | 63    | 8.59 |    |
| PTB7-Th | PC <sub>71</sub> BM | P8TTT               | -5    | -3.4  | -5.8  | -4    | -5.17 | -3.16 | 6   | 0.802 | 17.26 | 65.6  | 9.08 | 57 |
| J52     | IEICO-4F            | PC71BM              | -5.21 | -2.99 | -5.44 | -4.19 | -6.1  | -3.9  | 0   | 0.675 | 22.27 | 61.3  | 9.21 | 58 |
|         |                     |                     | -5.21 | -2.99 | -5.44 | -4.19 | -6.1  | -3.9  | 20  | 0.69  | 22.6  | 65.7  | 10.2 |    |
|         |                     |                     | -5.21 | -2.99 | -5.44 | -4.19 | -6.1  | -3.9  | 40  | 0.698 | 22.7  | 67.4  | 10.6 |    |
|         |                     |                     | -5.21 | -2.99 | -5.44 | -4.19 | -6.1  | -3.9  | 60  | 0.713 | 19.67 | 69.3  | 9.73 |    |
|         |                     |                     | -5.21 | -2.99 | -5.44 | -4.19 | -6.1  | -3.9  | 100 | 0.723 | 10.15 | 69.7  | 5.12 |    |
| PBDB-T  | IDT-2O              | PC <sub>71</sub> BM | -5.33 | -2.92 | -5.72 | -3.85 | -5.96 | -3.98 | 0   | 0.86  | 15.7  | 71.6  | 9.65 | 59 |
|         |                     |                     | -5.33 | -2.92 | -5.72 | -3.85 | -5.96 | -3.98 | 20  | 0.87  | 16.8  | 72.11 | 10.6 |    |
|         |                     |                     | -5.33 | -2.92 | -5.72 | -3.85 | -5.96 | -3.98 | 40  | 0.88  | 16.35 | 71.21 | 10.2 |    |



|         |                     |                     |       |       |       |       |       |       |     |       |       |       |      |    |
|---------|---------------------|---------------------|-------|-------|-------|-------|-------|-------|-----|-------|-------|-------|------|----|
|         |                     |                     | -5.33 | -2.92 | -5.72 | -3.85 | -5.96 | -3.98 | 60  | 0.88  | 15.76 | 69.78 | 9.78 |    |
|         |                     |                     | -5.33 | -2.92 | -5.72 | -3.85 | -5.96 | -3.98 | 80  | 0.87  | 15.18 | 69.46 | 9.24 |    |
|         |                     |                     | -5.33 | -2.92 | -5.72 | -3.85 | -5.96 | -3.98 | 100 | 0.86  | 13.3  | 64.67 | 7.47 |    |
| PTB7    | PC <sub>71</sub> BM | FeS2                | -5.2  | -3.3  | -6.1  | -3.9  | -4.9  | -4.2  | 0   | 0.73  | 14.48 | 47    | 4.98 | 60 |
|         |                     |                     | -5.2  | -3.3  | -6.1  | -3.9  | -4.9  | -4.2  | 25  | 0.64  | 11.15 | 23    | 1.57 |    |
|         |                     |                     | -5.2  | -3.3  | -6.1  | -3.9  | -4.9  | -4.2  | 50  | 0.77  | 15.31 | 52    | 6.02 |    |
|         |                     |                     | -5.2  | -3.3  | -6.1  | -3.9  | -4.9  | -4.2  | 100 | 0.71  | 15.21 | 50    | 5.48 |    |
| PBDB-T  | NCIC                | PC <sub>71</sub> BM | -5.36 | -3.54 | -5.37 | -3.73 | -6    | -3.9  | 0   | 1     | 12.69 | 57.6  | 7.31 | 61 |
|         |                     |                     | -5.36 | -3.54 | -5.37 | -3.73 | -6    | -3.9  | 33  | 0.9   | 15.55 | 52.7  | 7.38 |    |
|         |                     |                     | -5.36 | -3.54 | -5.37 | -3.73 | -6    | -3.9  | 50  | 0.88  | 16.78 | 56.4  | 8.32 |    |
|         |                     |                     | -5.36 | -3.54 | -5.37 | -3.73 | -6    | -3.9  | 60  | 0.84  | 17.03 | 56.4  | 8.29 |    |
| PBDB-T  | NCFIC               | PC <sub>71</sub> BM | -5.36 | -3.54 | -5.43 | -3.94 | -6    | -3.9  | 0   | 0.88  | 15.19 | 56.3  | 7.52 | 61 |
|         |                     |                     | -5.36 | -3.54 | -5.43 | -3.94 | -6    | -3.9  | 33  | 0.86  | 16.97 | 61.8  | 9.01 |    |
|         |                     |                     | -5.36 | -3.54 | -5.43 | -3.94 | -6    | -3.9  | 50  | 0.84  | 16.98 | 61.9  | 8.83 |    |
|         |                     |                     | -5.36 | -3.54 | -5.43 | -3.94 | -6    | -3.9  | 60  | 0.84  | 17.79 | 61.4  | 9.18 |    |
| LQ-51   | PC <sub>71</sub> BM | PCDTBT              | -5.1  | -3.4  | -6.1  | -4.3  | -5.5  | -3.6  | 0   | 0.83  | 9.47  | 47.77 | 3.75 | 62 |
|         |                     |                     | -5.1  | -3.4  | -6.1  | -4.3  | -5.5  | -3.6  | 9   | 0.84  | 9.74  | 49.43 | 4.04 |    |
|         |                     |                     | -5.1  | -3.4  | -6.1  | -4.3  | -5.5  | -3.6  | 23  | 0.84  | 10.19 | 50.76 | 4.35 |    |
|         |                     |                     | -5.1  | -3.4  | -6.1  | -4.3  | -5.5  | -3.6  | 33  | 0.85  | 10.12 | 51.64 | 4.44 |    |
|         |                     |                     | -5.1  | -3.4  | -6.1  | -4.3  | -5.5  | -3.6  | 41  | 0.85  | 10.86 | 51.98 | 4.8  |    |
|         |                     |                     | -5.1  | -3.4  | -6.1  | -4.3  | -5.5  | -3.6  | 50  | 0.87  | 10.46 | 50.92 | 4.64 |    |
|         |                     |                     | -5.1  | -3.4  | -6.1  | -4.3  | -5.5  | -3.6  | 100 | 0.87  | 6.52  | 57.59 | 3.27 |    |
| PTB7-Th | PC <sub>71</sub> BM | CPDT-(TIC)2         | -5.22 | -3.64 | -6.1  | -4.3  | -5.51 | -4.08 | 0   | 0.778 | 16.21 | 60.1  | 7.58 | 63 |
|         |                     |                     | -5.22 | -3.64 | -6.1  | -4.3  | -5.51 | -4.08 | 3.3 | 0.8   | 16.33 | 64.8  | 8.46 |    |

|            |                     |                     |       |       |       |      |       |       |     |       |       |       |           |    |
|------------|---------------------|---------------------|-------|-------|-------|------|-------|-------|-----|-------|-------|-------|-----------|----|
|            |                     |                     | -5.22 | -3.64 | -6.1  | -4.3 | -5.51 | -4.08 | 6.7 | 0.795 | 17.21 | 64.3  | 8.8       |    |
|            |                     |                     | -5.22 | -3.64 | -6.1  | -4.3 | -5.51 | -4.08 | 13. | 0.792 | 17.5  | 60.6  | 8.4       |    |
|            |                     |                     | -5.22 | -3.64 | -6.1  | -4.3 | -5.51 | -4.08 | 26. | 0.788 | 18.53 | 55.5  | 8.1       |    |
|            |                     |                     | -5.22 | -3.64 | -6.1  | -4.3 | -5.51 | -4.08 | 40  | 0.787 | 18.12 | 48.9  | 6.98      |    |
|            |                     |                     | -5.22 | -3.64 | -6.1  | -4.3 | -5.51 | -4.08 | 60  | 0.735 | 5.51  | 29.1  | 1.18      |    |
|            |                     |                     | -5.22 | -3.64 | -6.1  | -4.3 | -5.51 | -4.08 | 5   | 0.803 | 19    | 61.6  | 9.48      |    |
| PTB7-Th    | PC <sub>71</sub> BM | DFNPy               | -5.24 | -3.61 | -6    | -4   | -5.54 | -2.79 | 0   | 0.77  | 18.39 | 65.49 | 9.26      | 64 |
|            |                     |                     | -5.24 | -3.61 | -6    | -4   | -5.54 | -2.79 | 5   | 0.77  | 18.66 | 66.13 | 9.59      |    |
|            |                     |                     | -5.24 | -3.61 | -6    | -4   | -5.54 | -2.79 | 10  | 0.78  | 19.14 | 67.26 | 10.0      |    |
|            |                     |                     | -5.24 | -3.61 | -6    | -4   | -5.54 | -2.79 | 15  | 0.78  | 19.45 | 67.61 | 10.2      |    |
|            |                     |                     | -5.24 | -3.61 | -6    | -4   | -5.54 | -2.79 | 20  | 0.78  | 18.14 | 67.35 | 9.49      |    |
| PBDB-T     | PC <sub>71</sub> BM | IT-M                | -5.33 | -3.53 | -6.1  | -4.3 | -5.58 | -3.98 | 0   | 0.836 | 11.99 | 67.54 | 6.77      | 65 |
|            |                     |                     | -5.33 | -3.53 | -6.1  | -4.3 | -5.58 | -3.98 | 30  | 0.863 | 13.98 | 67.26 | 8.16      |    |
|            |                     |                     | -5.33 | -3.53 | -6.1  | -4.3 | -5.58 | -3.98 | 50  | 0.871 | 15.29 | 68.29 | 9.1       |    |
|            |                     |                     | -5.33 | -3.53 | -6.1  | -4.3 | -5.58 | -3.98 | 70  | 0.897 | 15.51 | 67.74 | 9.43      |    |
|            |                     |                     | -5.33 | -3.53 | -6.1  | -4.3 | -5.58 | -3.98 | 80  | 0.915 | 16.44 | 67.58 | 10.1      |    |
|            |                     |                     | -5.33 | -3.53 | -6.1  | -4.3 | -5.58 | -3.98 | 90  | 0.926 | 15.44 | 69.07 | 9.87      |    |
|            |                     |                     | -5.33 | -3.53 | -6.1  | -4.3 | -5.58 | -3.98 | 100 | 0.93  | 14.59 | 65.7  | 8.88      |    |
| PBDB-T-2Cl | Y6                  | PC <sub>71</sub> BM | -5.51 | -3.71 | -5.65 | -4.1 | -5.96 | -3.98 | 0   | 0.868 | 24.98 | 71.42 | 15.4<br>9 | 66 |
|            |                     |                     | -5.51 | -3.71 | -5.65 | -4.1 | -5.96 | -3.98 | 8   | 0.868 | 25.33 | 73.93 | 16.2      |    |
|            |                     |                     | -5.51 | -3.71 | -5.65 | -4.1 | -5.96 | -3.98 | 14  | 0.868 | 25.44 | 75.66 | 16.7      |    |
|            |                     |                     | -5.51 | -3.71 | -5.65 | -4.1 | -5.96 | -3.98 | 20  | 0.868 | 25.28 | 74.23 | 16.2      |    |
|            |                     |                     | -5.51 | -3.71 | -5.65 | -4.1 | -5.96 | -3.98 | 29  | 0.868 | 24.9  | 72.27 | 15.6      |    |

|          |                     |                     |       |       |       |       |       |       |     |       |       |       |      |    |
|----------|---------------------|---------------------|-------|-------|-------|-------|-------|-------|-----|-------|-------|-------|------|----|
|          |                     |                     | -5.51 | -3.71 | -5.65 | -4.1  | -5.96 | -3.98 | 45  | 0.868 | 23.9  | 68.29 | 14.1 |    |
|          |                     |                     | -5.51 | -3.71 | -5.65 | -4.1  | -5.96 | -3.98 | 100 | 0.97  | 11.73 | 63.83 | 7.28 |    |
| DR3TBDTT | PC <sub>71</sub> BM | DR3TBDTT-E          | -5.02 | -3.27 | -6.1  | -3.9  | -5.22 | -3.46 | 0   | 0.88  | 13.52 | 74.9  | 8.9  | 67 |
|          |                     |                     | -5.02 | -3.27 | -6.1  | -3.9  | -5.22 | -3.46 | 10  | 0.896 | 14.97 | 76.5  | 10.2 |    |
|          |                     |                     | -5.02 | -3.27 | -6.1  | -3.9  | -5.22 | -3.46 | 20  | 0.901 | 12.67 | 74.7  | 8.52 |    |
|          |                     |                     | -5.02 | -3.27 | -6.1  | -3.9  | -5.22 | -3.46 | 40  | 0.895 | 12.56 | 61.5  | 6.92 |    |
|          |                     |                     | -5.02 | -3.27 | -6.1  | -3.9  | -5.22 | -3.46 | 60  | 0.902 | 12.38 | 58.4  | 6.52 |    |
|          |                     |                     | -5.02 | -3.27 | -6.1  | -3.9  | -5.22 | -3.46 | 80  | 0.92  | 11.24 | 54.7  | 5.66 |    |
|          |                     |                     | -5.02 | -3.27 | -6.1  | -3.9  | -5.22 | -3.46 | 100 | 0.944 | 10.85 | 68.2  | 6.99 |    |
| PTB7-Th  | 3TT-FIC             | PC <sub>71</sub> BM | -5.24 | -3.66 | -5.42 | -4.17 | -6.19 | -4    | 0   | 0.662 | 25.89 | 71.2  | 12.2 | 68 |
|          |                     |                     | -5.24 | -3.66 | -5.42 | -4.17 | -6.19 | -4    | 11  | 0.666 | 27.36 | 71.9  | 13.1 |    |
|          |                     |                     | -5.24 | -3.66 | -5.42 | -4.17 | -6.19 | -4    | 20  | 0.669 | 27.73 | 73    | 13.5 |    |
|          |                     |                     | -5.24 | -3.66 | -5.42 | -4.17 | -6.19 | -4    | 27  | 0.671 | 27.29 | 69    | 12.6 |    |
| PTB7-Th  | PC <sub>71</sub> BM | TPB                 | -5.2  | -3.6  | -6    | -3.9  | -5.7  | -3.9  | 0   | 0.78  | 17.2  | 70    | 9.4  | 69 |
|          |                     |                     | -5.2  | -3.6  | -6    | -3.9  | -5.7  | -3.9  | 5   | 0.77  | 17.8  | 70    | 9.7  |    |
|          |                     |                     | -5.2  | -3.6  | -6    | -3.9  | -5.7  | -3.9  | 10  | 0.78  | 19.4  | 68    | 10.2 |    |
|          |                     |                     | -5.2  | -3.6  | -6    | -3.9  | -5.7  | -3.9  | 20  | 0.77  | 19.4  | 67    | 10   |    |
|          |                     |                     | -5.2  | -3.6  | -6    | -3.9  | -5.7  | -3.9  | 30  | 0.76  | 13.6  | 65    | 6.7  |    |
| PTB7-Th  | PC <sub>71</sub> BM | PTN                 | -5.2  | -3.6  | -6.1  | -3.9  | -5.28 | -2.24 | 0   | 0.77  | 18.66 | 61.03 | 8.91 | 70 |
|          |                     |                     | -5.2  | -3.6  | -6.1  | -3.9  | -5.28 | -2.24 | 5   | 0.77  | 19.74 | 62.34 | 9.81 |    |
|          |                     |                     | -5.2  | -3.6  | -6.1  | -3.9  | -5.28 | -2.24 | 10  | 0.78  | 20.18 | 64.2  | 10.4 |    |
|          |                     |                     | -5.2  | -3.6  | -6.1  | -3.9  | -5.28 | -2.24 | 15  | 0.78  | 21.47 | 68.31 | 11.4 |    |
|          |                     |                     | -5.2  | -3.6  | -6.1  | -3.9  | -5.28 | -2.24 | 20  | 0.78  | 20.24 | 62.02 | 9.79 |    |

|         |                     |                     |       |       |       |       |       |       |     |       |       |       |      |    |
|---------|---------------------|---------------------|-------|-------|-------|-------|-------|-------|-----|-------|-------|-------|------|----|
| PTB7-Th | PC <sub>71</sub> BM | EH-5T-TTC           | -5.24 | -3.66 | -6    | -4    | -5.19 | -3.19 | 0   | 0.77  | 11.4  | 36.5  | 3.2  | 71 |
|         |                     |                     | -5.24 | -3.66 | -6    | -4    | -5.19 | -3.19 | 10  | 0.778 | 15    | 52    | 6.09 |    |
| OFQx-T  | PC <sub>71</sub> BM | ITIC                | -5.44 | -3.55 | -6.19 | -4    | -5.49 | -3.81 | 0   | 0.86  | 12.26 | 72    | 7.59 | 72 |
|         |                     |                     | -5.44 | -3.55 | -6.19 | -4    | -5.49 | -3.81 | 50  | 0.89  | 14.35 | 64    | 8.17 |    |
| OFQx-T  | PC <sub>71</sub> BM | PTB7-Th             | -5.44 | -3.55 | -6.19 | -4    | -5.38 | -3.56 | 0   | 0.86  | 12.26 | 72    | 7.59 | 72 |
|         |                     |                     | -5.44 | -3.55 | -6.19 | -4    | -5.38 | -3.56 | 50  | 0.82  | 14.77 | 72    | 8.72 |    |
| PTB7-Th | IEICO-4F            | PC <sub>71</sub> BM | -5.22 | -3.64 | -5.44 | -4.19 | -5.96 | -3.98 | 0   | 0.74  | 20.62 | 58.55 | 8.96 | 73 |
|         |                     |                     | -5.22 | -3.64 | -5.44 | -4.19 | -5.96 | -3.98 | 6   | 0.74  | 23.63 | 58    | 10.1 |    |
| PM6     | BTCT-2Cl            | PC <sub>71</sub> BM | -5.54 | -3.65 | -5.56 | -3.95 | -5.96 | -3.98 | 0   | 0.877 | 24.4  | 70.4  | 15.1 | 74 |
|         |                     |                     | -5.54 | -3.65 | -5.56 | -3.95 | -5.96 | -3.98 | 17  | 0.881 | 25.1  | 72.6  | 16.1 |    |
| BTR     | Y6                  | PC <sub>71</sub> BM | -5.3  | -3.5  | -5.6  | -4.1  | -6.1  | -4.2  | 0   | 0.846 | 22.13 | 57.67 | 10.8 | 75 |
|         |                     |                     | -5.3  | -3.5  | -5.6  | -4.1  | -6.1  | -4.2  | 20  | 0.855 | 22.45 | 58.93 | 11.3 |    |
|         |                     |                     | -5.3  | -3.5  | -5.6  | -4.1  | -6.1  | -4.2  | 30  | 0.859 | 22.21 | 62    | 11.8 |    |
|         |                     |                     | -5.3  | -3.5  | -5.6  | -4.1  | -6.1  | -4.2  | 40  | 0.86  | 21.11 | 62.52 | 11.3 |    |
|         |                     |                     | -5.3  | -3.5  | -5.6  | -4.1  | -6.1  | -4.2  | 50  | 0.863 | 19.18 | 64.13 | 10.6 |    |
|         |                     |                     | -5.3  | -3.5  | -5.6  | -4.1  | -6.1  | -4.2  | 100 | 0.955 | 8.08  | 63.53 | 4.9  |    |
| PFT     | IT-4F               | PC <sub>71</sub> BM | -5.68 | -3.71 | -5.74 | -4.1  | -6.1  | -3.98 | 0   | 0.88  | 17.15 | 71.6  | 10.8 | 76 |
|         |                     |                     | -5.68 | -3.71 | -5.74 | -4.1  | -6.1  | -3.98 | 9   | 0.89  | 17.55 | 72.92 | 11.3 |    |
|         |                     |                     | -5.68 | -3.71 | -5.74 | -4.1  | -6.1  | -3.98 | 17  | 0.9   | 18.42 | 74.61 | 12.3 |    |
|         |                     |                     | -5.68 | -3.71 | -5.74 | -4.1  | -6.1  | -3.98 | 20  | 0.91  | 18.49 | 74.92 | 12.6 |    |
|         |                     |                     | -5.68 | -3.71 | -5.74 | -4.1  | -6.1  | -3.98 | 23  | 0.91  | 18.23 | 74.3  | 12.3 |    |
|         |                     |                     | -5.68 | -3.71 | -5.74 | -4.1  | -6.1  | -3.98 | 33  | 0.92  | 17.5  | 71.82 | 11.5 |    |
|         |                     |                     | -5.68 | -3.71 | -5.74 | -4.1  | -6.1  | -3.98 | 50  | 0.93  | 16.7  | 65.6  | 10.1 |    |
|         |                     |                     | -5.68 | -3.71 | -5.74 | -4.1  | -6.1  | -3.98 | 100 | 0.94  | 13.23 | 64    | 7.96 |    |

|        |                     |                     |       |       |       |       |       |       |     |      |       |       |      |    |
|--------|---------------------|---------------------|-------|-------|-------|-------|-------|-------|-----|------|-------|-------|------|----|
| CS03   | DPP8                | PC <sub>71</sub> BM | -5.13 | -3.48 | -5.34 | -3.81 | -6.1  | -4.1  | 0   | 0.88 | 13.86 | 61    | 7.44 | 77 |
|        |                     |                     | -5.13 | -3.48 | -5.34 | -3.81 | -6.1  | -4.1  | 20  | 0.82 | 16.04 | 68    | 8.94 |    |
|        |                     |                     | -5.13 | -3.48 | -5.34 | -3.81 | -6.1  | -4.1  | 100 | 0.69 | 12.46 | 59    | 5.07 |    |
| PM6    | PC <sub>71</sub> BM | N2200-F             | -5.5  | -3.6  | -6    | -4    | -5.8  | -3.9  | 0   | 0.92 | 12.59 | 67    | 7.38 | 78 |
|        |                     |                     | -5.5  | -3.6  | -6    | -4    | -5.8  | -3.9  | 30  | 0.91 | 13.01 | 69    | 8.11 |    |
|        |                     |                     | -5.5  | -3.6  | -6    | -4    | -5.8  | -3.9  | 100 | 0.89 | 12.26 | 63    | 7.34 |    |
| TDTBTA | MPU4                | PC <sub>71</sub> BM | -5.38 | -3.3  | -5.54 | -3.7  | -6.1  | -4.3  | 0   | 1.04 | 20.38 | 62    | 13.1 | 79 |
|        |                     |                     | -5.38 | -3.3  | -5.54 | -3.7  | -6.1  | -4.3  | 25  | 0.97 | 22.65 | 71    | 15.6 |    |
|        |                     |                     | -5.38 | -3.3  | -5.54 | -3.7  | -6.1  | -4.3  | 100 | 0.89 | 11.22 | 67    | 6.69 |    |
| PDBT-F | IDIC                | PC <sub>71</sub> BM | -5.39 | -3.57 | -5.69 | -3.91 | -5.79 | -3.85 | 0   | 0.87 | 17.65 | 71.5  | 11.0 | 80 |
|        |                     |                     | -5.39 | -3.57 | -5.69 | -3.91 | -5.79 | -3.85 | 10  | 0.89 | 18.69 | 70.88 | 11.8 |    |
|        |                     |                     | -5.39 | -3.57 | -5.69 | -3.91 | -5.79 | -3.85 | 20  | 0.89 | 19.41 | 64.14 | 11.0 |    |
|        |                     |                     | -5.39 | -3.57 | -5.69 | -3.91 | -5.79 | -3.85 | 50  | 0.91 | 16.06 | 64.49 | 9.45 |    |
|        |                     |                     | -5.39 | -3.57 | -5.69 | -3.91 | -5.79 | -3.85 | 100 | 0.93 | 12.63 | 61.96 | 7.28 |    |
| PCDTBT | PC <sub>71</sub> BM | PV12                | -5.4  | -3.55 | -5.96 | -4.26 | -5.49 | -3.9  | 0   | 0.84 | 10.87 | 57.1  | 5.28 | 81 |
|        |                     |                     | -5.4  | -3.55 | -5.96 | -4.26 | -5.49 | -3.9  | 10  | 0.87 | 11.5  | 61    | 6.21 |    |
|        |                     |                     | -5.4  | -3.55 | -5.96 | -4.26 | -5.49 | -3.9  | 15  | 0.88 | 12.01 | 63    | 6.73 |    |
|        |                     |                     | -5.4  | -3.55 | -5.96 | -4.26 | -5.49 | -3.9  | 20  | 0.86 | 11.63 | 62.8  | 6.39 |    |
|        |                     |                     | -5.4  | -3.55 | -5.96 | -4.26 | -5.49 | -3.9  | 30  | 0.84 | 11.22 | 59.4  | 5.62 |    |
|        |                     |                     | -5.4  | -3.55 | -5.96 | -4.26 | -5.49 | -3.9  | 100 | 0.8  | 5.91  | 60.9  | 2.93 |    |
| PIDTBT | PC <sub>71</sub> BM | ITIC                | -5.36 | -3.52 | -5.96 | -3.98 | -5.51 | -3.78 | 0   | 0.87 | 12    | 53.2  | 5.7  | 82 |
|        |                     |                     | -5.36 | -3.52 | -5.96 | -3.98 | -5.51 | -3.78 | 25  | 0.87 | 14.2  | 54    | 7    |    |
|        |                     |                     | -5.36 | -3.52 | -5.96 | -3.98 | -5.51 | -3.78 | 37. | 0.87 | 12.9  | 53.2  | 6.1  |    |
|        |                     |                     | -5.36 | -3.52 | -5.96 | -3.98 | -5.51 | -3.78 | 50  | 0.91 | 12.1  | 53.4  | 6.1  |    |

|         |                     |                     |       |       |       |       |       |       |     |      |       |       |      |    |
|---------|---------------------|---------------------|-------|-------|-------|-------|-------|-------|-----|------|-------|-------|------|----|
|         |                     |                     | -5.36 | -3.52 | -5.96 | -3.98 | -5.51 | -3.78 | 62. | 0.91 | 11.2  | 52.5  | 5.6  |    |
|         |                     |                     | -5.36 | -3.52 | -5.96 | -3.98 | -5.51 | -3.78 | 71  | 0.94 | 10.1  | 50.5  | 4.9  |    |
|         |                     |                     | -5.36 | -3.52 | -5.96 | -3.98 | -5.51 | -3.78 | 100 | 0.97 | 8.3   | 49    | 4.2  |    |
| DR3     | ICC6                | PC <sub>71</sub> BM | -5.11 | -3.4  | -5.82 | -4.18 | -5.91 | -4.1  | 0   | 0.87 | 15.2  | 64    | 8.7  | 83 |
|         |                     |                     | -5.11 | -3.4  | -5.82 | -4.18 | -5.91 | -4.1  | 29  | 0.87 | 16.3  | 72    | 10.8 |    |
|         |                     |                     | -5.11 | -3.4  | -5.82 | -4.18 | -5.91 | -4.1  | 41  | 0.86 | 16.4  | 70    | 10.3 |    |
|         |                     |                     | -5.11 | -3.4  | -5.82 | -4.18 | -5.91 | -4.1  | 50  | 0.85 | 16.4  | 69    | 9.9  |    |
|         |                     |                     | -5.11 | -3.4  | -5.82 | -4.18 | -5.91 | -4.1  | 67  | 0.81 | 14.1  | 60    | 7.2  |    |
| PTB7-Th | PC <sub>71</sub> BM | PBT1-S              | -5.22 | -3.64 | -6.1  | -3.9  | -5.43 | -3.33 | 0   | 0.82 | 16.4  | 71.2  | 9.5  | 84 |
|         |                     |                     | -5.22 | -3.64 | -6.1  | -3.9  | -5.43 | -3.33 | 5   | 0.82 | 16    | 72    | 9.8  |    |
|         |                     |                     | -5.22 | -3.64 | -6.1  | -3.9  | -5.43 | -3.33 | 10  | 0.82 | 17.3  | 72.2  | 10.3 |    |
|         |                     |                     | -5.22 | -3.64 | -6.1  | -3.9  | -5.43 | -3.33 | 15  | 0.83 | 16.5  | 68    | 9.3  |    |
|         |                     |                     | -5.22 | -3.64 | -6.1  | -3.9  | -5.43 | -3.33 | 100 | 0.83 | 11.8  | 68    | 7.5  |    |
| PTB7    | PC <sub>71</sub> BM | DIB-SQ              | -5.2  | -3.3  | -6    | -4.3  | -5.3  | -3.5  | 0   | 0.75 | 14.12 | 64.83 | 6.86 | 85 |
|         |                     |                     | -5.2  | -3.3  | -6    | -4.3  | -5.3  | -3.5  | 3   | 0.75 | 14.86 | 67.01 | 7.47 |    |
|         |                     |                     | -5.2  | -3.3  | -6    | -4.3  | -5.3  | -3.5  | 6   | 0.75 | 15.29 | 69.09 | 7.92 |    |
|         |                     |                     | -5.2  | -3.3  | -6    | -4.3  | -5.3  | -3.5  | 9   | 0.75 | 14.55 | 66.12 | 7.22 |    |
|         |                     |                     | -5.2  | -3.3  | -6    | -4.3  | -5.3  | -3.5  | 12  | 0.75 | 14.01 | 63.3  | 6.65 |    |
|         |                     |                     | -5.2  | -3.3  | -6    | -4.3  | -5.3  | -3.5  | 100 | 0.77 | 8.28  | 35.92 | 2.29 |    |
| PTB7-Th | PC <sub>71</sub> BM | DB-Qx               | -5.4  | -3.8  | -6.1  | -4.3  | -5.6  | -3.6  | 0   | 0.81 | 14.05 | 52.01 | 5.98 | 86 |
|         |                     |                     | -5.4  | -3.8  | -6.1  | -4.3  | -5.6  | -3.6  | 10  | 0.8  | 15.93 | 62.2  | 8.2  |    |
|         |                     |                     | -5.4  | -3.8  | -6.1  | -4.3  | -5.6  | -3.6  | 20  | 0.8  | 15.5  | 66.92 | 8.4  |    |
|         |                     |                     | -5.4  | -3.8  | -6.1  | -4.3  | -5.6  | -3.6  | 30  | 0.8  | 15.4  | 69.08 | 8.64 |    |
|         |                     |                     | -5.4  | -3.8  | -6.1  | -4.3  | -5.6  | -3.6  | 40  | 0.8  | 15.15 | 68.05 | 8.46 |    |

|             |                     |                     |       |       |       |       |       |       |     |       |       |      |           |    |
|-------------|---------------------|---------------------|-------|-------|-------|-------|-------|-------|-----|-------|-------|------|-----------|----|
| PTB7        | PC <sub>71</sub> BM | GO-TNF              | -5.15 | -3.3  | -6    | -4.3  | -5.66 | -4.13 | 0   | 0.76  | 16.2  | 61.8 | 7.61      | 87 |
|             |                     |                     | -5.15 | -3.3  | -6    | -4.3  | -5.66 | -4.13 | 1   | 0.76  | 16.54 | 63   | 7.92      |    |
|             |                     |                     | -5.15 | -3.3  | -6    | -4.3  | -5.66 | -4.13 | 2   | 0.76  | 17.21 | 64   | 8.37      |    |
|             |                     |                     | -5.15 | -3.3  | -6    | -4.3  | -5.66 | -4.13 | 3   | 0.76  | 16.53 | 62.4 | 7.84      |    |
| PffBT4T-2OD | PC <sub>71</sub> BM | PCDTBT8             | -5.34 | -3.69 | -6    | -4    | -5.4  | -3.27 | 0   | 0.75  | 19.5  | 72.2 | 10.5<br>7 | 88 |
|             |                     |                     | -5.34 | -3.69 | -6    | -4    | -5.4  | -3.27 | 5   | 0.76  | 19.2  | 74.3 | 10.8      |    |
|             |                     |                     | -5.34 | -3.69 | -6    | -4    | -5.4  | -3.27 | 10  | 0.77  | 19    | 75.1 | 11.0      |    |
|             |                     |                     | -5.34 | -3.69 | -6    | -4    | -5.4  | -3.27 | 15  | 0.79  | 18.8  | 74.7 | 11.1      |    |
|             |                     |                     | -5.34 | -3.69 | -6    | -4    | -5.4  | -3.27 | 20  | 0.81  | 17.9  | 73.1 | 10.5      |    |
|             |                     |                     | -5.34 | -3.69 | -6    | -4    | -5.4  | -3.27 | 30  | 0.82  | 16.2  | 67.1 | 9.1       |    |
| PBDB-T      | m-INPOIC            | PC <sub>71</sub> BM | -5.33 | -3.29 | -5.41 | -3.97 | -6    | -4    | 0   | 0.85  | 21.3  | 66.9 | 12.1      | 89 |
|             |                     |                     | -5.33 | -3.29 | -5.41 | -3.97 | -6    | -4    | 13  | 0.857 | 22.8  | 71.6 | 14        |    |
|             |                     |                     | -5.33 | -3.29 | -5.41 | -3.97 | -6    | -4    | 23  | 0.858 | 20.2  | 67.3 | 11.6      |    |
| PTB7-Th     | PC <sub>71</sub> BM | N2200               | -5.24 | -3.66 | -6    | -4    | -5.49 | -4.04 | 0   | 0.81  | 15.2  | 69.6 | 8.6       | 90 |
|             |                     |                     | -5.24 | -3.66 | -6    | -4    | -5.49 | -4.04 | 17  | 0.82  | 14.3  | 53   | 6.2       |    |
|             |                     |                     | -5.24 | -3.66 | -6    | -4    | -5.49 | -4.04 | 33  | 0.82  | 14    | 52.5 | 6         |    |
|             |                     |                     | -5.24 | -3.66 | -6    | -4    | -5.49 | -4.04 | 50  | 0.83  | 12.3  | 52   | 5.3       |    |
|             |                     |                     | -5.24 | -3.66 | -6    | -4    | -5.49 | -4.04 | 67  | 0.8   | 9.3   | 49.1 | 3.7       |    |
|             |                     |                     | -5.24 | -3.66 | -6    | -4    | -5.49 | -4.04 | 100 | 0.8   | 10.4  | 56.5 | 4.7       |    |

## Supplemental References

1. V. Piradi, X. Xu, Z. Wang, J. Ali, Q. Peng, F. Liu and X. Zhu, *ACS Appl. Mater. Interfaces*, 2019, **11**, 6283-6291.
2. S. Karuthedath, Y. Firdaus, R. Z. Liang, J. Gorenflot, P. M. Beaujuge, T. D. Anthopoulos and F. Laquai, *Adv. Energy Mater*, 2019, **9**,1901443.
3. C. Rodríguez-Seco, L. Cabau, M. Privado, P. de la Cruz, F. Langa, G. D. Sharma and E. Palomares, *ACS Appl. Energy Mater*, 2020, **3**, 12506-12516.
4. X. Fu, H. Xu, D. Zhou, X. Cheng, L. Huang, L. Chen and Y. Chen, *J. Mater. Sci*, 2018, **53**, 8398-8408.
5. C. e. Zhang, P. Jiang, X. Zhou, H. Liu, Q. Guo, X. Xu, Y. Liu, Z. Tang, W. Ma and Z. Bo, *J. Mater. Chem. A*, 2020, **8**, 2123-2130.
6. B. Wang, Y. Fu, C. Yan, R. Zhang, Q. Yang, Y. Han and Z. Xie, *Front Chem*, 2018, **6**, 198.
7. L. Qing, A. Zhong, W. Chen, Y. Cao and J. Chen, *Polymer*, 2020, **186**,122050.
8. D. Xia, Z. Zhang, C. Zhao, J. Wang, J. Xia, G. Chen, S. Li, Z. Tang, S. You and W. Li, *J Colloid Interface Sci*, 2021, **601**, 70-77.
9. X. Li, L. Zhou, X. Lu, L. Cao, X. Du, H. Lin, C. Zheng and S. Tao, *Mater. Chem. Front*, 2021, **5**, 3850-3858.
10. M. Kim, J. Lee, D. H. Sin, H. Lee, H. Y. Woo and K. Cho, *ACS Appl. Mater*, 2018, **10**, 25570-25579.
11. B. Zhu, X. Chen, S. Huang and X. Peng, *Dyes Pigm*, 2019, **164**, 148-155.
12. X. Du, H. Lin, X. Chen, S. Tao, C. Zheng and X. Zhang, *Nanoscale*, 2018, **10**, 16455-16467.
13. L. Duan, X. Meng, Y. Zhang, H. Yi, K. Jin, F. Haque, C. Xu, Z. Xiao, L. Ding and A. Uddin, *Mater. Chem. Front*, 2019, **3**, 1085-1096.
14. X. Liu, S. Du, Z. Fu, C. Chen, J. Tong, J. Li, N. Zheng, R. Zhang and Y. Xia, *Sol. Energy*, 2021, **222**, 18-26.
15. B. Qiu, S. Chen, C. Sun, J. Yuan, X. Zhang, C. Zhu, S. Qin, L. Meng, Y. Zhang, C. Yang, Y. Zou and Y. Li, *Sol. RRL*, 2020, **4**,1900540.
16. X. Du, S. Tao, L. Li, W. Wang, C. Zheng, H. Lin, X. Zhang and X. Zhang, *Sol. RRL*, 2018, **2**,1800038.
17. W. Li, Y. Yan, Y. Gong, J. Cai, F. Cai, R. S. Gurney, D. Liu, A. J. Pearson, D. G. Lidzey and T. Wang, *Adv. Funct. Mater*, 2018, **28**,1704212.
18. J. Ren, Y. Sun, S. Huang, Z. Huai, L. Wang, W. Kong and S. Yang, *Org. Electron*, 2020, **78**,105587.
19. X. Liu, Z. Liang, S. Du, J. Tong, J. Li, R. Zhang, X. Shi, L. Yan, X. Bao and Y. Xia, *ACS Appl. Energy Mater*, 2021, **4**, 1774-1783.
20. C. Xu, M. Wright, D. Ping, H. Yi, X. Zhang, M. D. A. Mahmud, K. Sun, M. B. Upama, F. Haque and A. Uddin, *Org. Electron*, 2018, **62**, 261-268.
21. H. Hwang, D. H. Sin, C. Park and K. Cho, *Sci Rep*, 2019, **9**, 12081.
22. Y. Sun, G. Li, L. Wang, Z. Huai, R. Fan, S. Huang, G. Fu and S. Yang, *Sol. Energy Mater. Sol. Cells*, 2018, **182**, 45-51.
23. H. Tang, T. Xu, C. Yan, J. Gao, H. Yin, J. Lv, R. Singh, M. Kumar, T. Duan, Z. Kan, S. Lu and G. Li, *Adv Sci (Weinh)*, 2019, **6**, 1901613.
24. J. Chen, C. Tang, S. Guo, Z. Wang, Z. He, Y.-J. Hwang, W. Yan, H. Xin, W. Huang, *Org. Electron*. 2020,**77**,105419.



25. H. Fu, C. Li, P. Bi, X. Hao, F. Liu, Y. Li, Z. Wang and Y. Sun, *Adv. Funct. Mater.*, 2019, **29**,1807006.
26. M. Privado, F. G. Guijarro, P. de la Cruz, R. Singhal, F. Langa and G. D. Sharma, *ACS Appl. Mater. Interfaces*, 2021, **13**, 6461-6469.
27. K.-N. Zhang, Z.-N. Jiang, T. Wang, J.-W. Qiao, L. Feng, C.-C. Qin, H. Yin, S.-K. So and X.-T. Hao, *Nano Energy*, 2021, **79**,105513.
28. C.-H. Chen, Y.-J. Lu, Y.-W. Su, Y.-C. Lin, H.-K. Lin, H.-C. Chen, H.-C. Wang, J.-X. Li, K.-H. Wu and K.-H. Wei, *Org. Electron*, 2019, **71**, 185-193.
29. M. Vartanian, P. de la Cruz, S. Biswas, G. D. Sharma and F. Langa, *Nanoscale*, 2018, **10**, 12100-12108.
30. C. Xu, J. Wang, Q. An, X. Ma, Z. Hu, J. Gao, J. Zhang and F. Zhang, *Nano Energy*, 2019, **66**.
31. J. Lee, J.-H. Lee, H. Yao, H. Cha, S. Hong, S. Lee, J. Kim, J. R. Durrant, J. Hou and K. Lee, *J. Mater. Chem. A*, 2020, **8**, 6682-6691.
32. H. Dahiya, V. Cuesta, P. de la Cruz, F. Langa and G. D. Sharma, *ACS Appl. Energy Mater.*, 2021, **4**, 4498-4506.
33. T. Sano, S. Inaba and V. Vohra, *ACS Appl. Energy Mater.*, 2019, **2**, 2534-2540.
34. Z. Yin, S. Mei, L. Chen, P. Gu, J. Huang, X. Li, H.-Q. Wang and W. Song, *Org. Electron*, 2021, **99**,106308.
35. D. H. Kim, J. Ryu, F. T. A. Wibowo, S. Y. Park, J. Y. Kim, S.-Y. Jang and S. Cho, *ACS Appl. Energy Mater.*, 2020, **3**, 8375-8382.
36. T. Yan, W. Song, J. Huang, R. Peng, L. Huang and Z. Ge, *Adv Mater.*, 2019, **31**, e1902210.
37. A. A. Mohapatra, V. Kim, B. Puttaraju, A. Sadhanala, X. Jiao, C. R. McNeill, R. H. Friend and S. Patil, *ACS Appl. Energy Mater.*, 2018, **1**, 4874-4882.
38. J. W. Ha, C. E. Song, H. S. Kim, D. H. Ryu, W. S. Shin and D. H. Hwang, *ACS Appl Mater Interfaces*, 2020, **12**, 51699-51708.
39. Y.-J. Xue, F.-Y. Cao, P.-K. Huang, Y.-C. Su and Y.-J. Cheng, *J. Mater. Chem. A*, 2020, **8**, 5315-5322.
40. S.-L. Chang, F.-Y. Cao, K.-H. Huang, W.-L. Lee, M.-H. Lee, C.-S. Hsu and Y.-J. Cheng, *J. Mater. Chem. A*, 2020, **8**, 12141-12148.
41. Y. Wang, W. Xu, J. Yi, C. Zuo, Y. Gong, Y. Liu, W.-Y. Lai and W. Huang, *J. Mater. Chem. A*, 2018, **6**, 15977-15984.
42. K.-N. Zhang, X.-Y. Yang, M.-S. Niu, Z.-C. Wen, Z.-H. Chen, L. Feng, X.-J. Feng and X.-T. Hao, *Org. Electron*, 2019, **66**, 13-23.
43. C.-H. Zhang, W. Wang, W. Huang, J. Wang, Z. Hu, Z. Lin, T. Yang, F. Lin, Y. Xing, J. Bai, H. Sun and Y. Liang, *Chem. Mater.*, 2019, **31**, 3025-3033.
44. Y. Lin, B. Adilbekova, Y. Firdaus, E. Yengel, H. Faber, M. Sajjad, X. Zheng, E. Yarali, A. Seitkhan, O. M. Bakr, A. El-Labban, U. Schwingenschlogl, V. Tung, I. McCulloch, F. Laquai and T. D. Anthopoulos, *Adv Mater.*, 2019, **31**, e1902965.
45. R. Geng, X. Song, H. Feng, J. Yu, M. Zhang, N. Gasparini, Z. Zhang, F. Liu, D. Baran and W. Tang, *ACS Energy Lett.*, 2019, **4**, 763-770.
46. J. Yin, W. Zhou, Q. Ai, X. Meng, S. Liu, Z. Yu, J. Zeng and Y. Chen, *Chin. J. Chem.*, 2018, **36**, 437-442.
47. R. Datt, R. Sharma, S. Bishnoi and V. Gupta, *Mater. Lett.*, 2019, **251**, 122-125.
48. M. Privado, C. R. Seco, R. Singhal, P. d. l. Cruz, F. Langa, G. D. Sharma and E. Palomares, *ACS*

- Energy Lett*, 2018, **3**, 2418-2424.
49. C. Xue, T. Zhang, K. Ma, P. Wan, L. Hong, B. Xu and C. An, *Macromol Rapid Commun*, 2019, **40**, e1900246.
  50. Y.-Q.-Q. Yi, H. Feng, N. Zheng, X. Ke, B. Kan, M. Chang, Z. Xie, X. Wan, C. Li and Y. Chen, *Chem. Mater*, 2019, **31**, 904-911.
  51. F.-Y. Cao, P.-K. Huang, Y.-C. Su, W.-C. Huang, S.-L. Chang, K.-E. Hung and Y.-J. Cheng, *J. Mater. Chem. A*, 2019, **7**, 17947-17953.
  52. R. Singh, S. C. Shin, H. Lee, M. Kim, J. W. Shim, K. Cho and J. J. Lee, *Chem. Eur*, 2019, **25**, 6154-6161.
  53. D. Huang, F. Bian, D. Zhu, X. Bao, C. Hong, P. Zhou, Y. Huang and C. Yang, *J. Phys. Chem. C*, 2019, **123**, 14976-14984.
  54. L. Liu, H. Zhang, B. Xiao, Y. Liu, B. Xu, C. Wang, S. Wen, E. Zhou, G. Chen, C. Im and W. Tian, *Front. Chem. Sci. Eng*, 2020, **15**, 127-137.
  55. L. Zhan, S. Li, S. Zhang, X. Chen, T. K. Lau, X. Lu, M. Shi, C. Z. Li and H. Chen, *ACS Appl Mater Interfaces*, 2018, **10**, 42444-42452.
  56. Y.-Q.-Q. Yi, H. Feng, X. Ke, J. Yan, M. Chang, X. Wan, C. Li and Y. Chen, *J. Mater. Chem. C*, 2019, **7**, 4013-4019.
  57. C.-H. Tsai, Y.-A. Su, P.-C. Lin, C.-C. Shih, H.-C. Wu, W.-C. Chen and C.-C. Chueh, *J. Mater. Chem. C*, 2018, **6**, 6920-6928.
  58. H. Shi, R. Xia, G. Zhang, H.-L. Yip and Y. Cao, *Adv. Energy Mater*, 2019, **9**, 1803438.
  59. C. e. Zhang, S. Feng, Y. Liu, S. Ming, H. Lu, D. Ma, X. Xu, Y. Wu and Z. Bo, *J. Mater. Chem. A*, 2018, **6**, 6854-6859.
  60. O. Amargos-Reyes, J. L. Maldonado, O. Martinez-Alvarez, M. E. Nicho, J. Santos-Cruz, J. Nicasio-Collazo, I. Caballero-Quintana and C. Arenas-Arrocena, *Beilstein J Nanotechnol*, 2019, **10**, 2238-2250.
  61. F.-Y. Cao, W.-C. Huang, S.-L. Chang and Y.-J. Cheng, *Chem. Mater*, 2018, **30**, 4968-4977.
  62. Y. Zhu, J. Liu, J. Zhao, Y. Li, B. Qiao, D. Song, Y. Huang, Z. Xu, S. Zhao and X. Xu, *Materials (Basel)*, 2018, **11**, 759.
  63. Y. Zhang, X. Liu, H. Gu, L. Yan, H. Tan, C.-Q. Ma and Y. Lin, *Org. Electron*, 2020, **77**, 105530.
  64. L. Li, H. Lin, X. Kong, X. Du, X. Chen, L. Zhou, S. Tao, C. Zheng and X. Zhang, *Nanoscale*, 2018, **10**, 9971-9980.
  65. Z. Chen, H. Chen, C. Feng, X. Wang, Z. He and Y. Cao, *J. Mater. Chem. C*, 2021, **9**, 7658-7664.
  66. J. Gao, J. Wang, Q. An, X. Ma, Z. Hu, C. Xu, X. Zhang and F. Zhang, *Sci. China. Chem*, 2019, **63**, 83-91.
  67. Z. Wang, X. Zhu, J. Zhang, K. Lu, J. Fang, Y. Zhang, Z. Wang, L. Zhu, W. Ma, Z. Shuai and Z. Wei, *J Am Chem Soc*, 2018, **140**, 1549-1556.
  68. H. H. Gao, Y. Sun, X. Wan, X. Ke, H. Feng, B. Kan, Y. Wang, Y. Zhang, C. Li and Y. Chen, *Adv Sci (Weinh)*, 2018, **5**, 1800307.
  69. V. Sharapov, Q. Wu, A. Neshchadin, D. Zhao, Z. Cai, W. Chen and L. Yu, *J. Phy. Chem. C*, 2018, **122**, 11305-11311.
  70. X. Du, B. Liu, L. Li, X. Kong, C. Zheng, H. Lin, Q. Tong, S. Tao and X. Zhang, *J. Mater. Chem. A*, 2018, **6**, 23840-23855.
  71. L. Krishnan Jagadamma, R. G. D. Taylor, Alexander L. Kanibolotsky, M. T. Sajjad, I. A. Wright, P. N. Horton, S. J. Coles, I. D. W. Samuel and P. J. Skabara, *Sustainable Energy Fuels*,

- 2019, **3**, 2087-2099.
72. Y. Zhao, L. Zhou, X. Wu, X. Wang, Y. Li, Y. Qi, L. Jiang, G. Chen and Y. Zou, *Chin. Chem. Lett.* 2021, **32**, 1359-1362.
73. Z. Wang, J. Ji, W. Lin, Y. Yao, K. Zheng and Z. Liang, *Adv. Funct. Mater.*, 2020, **30**,2001564.
74. X. Li, M.-A. Pan, T.-K. Lau, W. Liu, K. Li, N. Yao, F. Shen, S. Huo, F. Zhang, Y. Wu, X. Li, X. Lu, H. Yan and C. Zhan, *Chem. Mater.*, 2020, **32**, 5182-5191.
75. Z. Li, C. Yan, L. Xiao, H. Mao, J. Liu, W. Tan and Y. Min, *Org. Electron.*, 2021, **93**,106135.
76. A. D. Fenta, C.-F. Lu, A. T. Gidey and C.-T. Chen, *ACS Appl. Energy Mater.*, 2021, **4**, 5274-5285.
77. C. R. Seco, A. Vidal-Ferran, R. Misra, G. D. Sharma and E. Palomares, *ACS Appl. Energy Mater.*, 2018, **1**, 4203-4210.
78. F. Liu, C. Li, J. Li, C. Wang, C. Xiao, Y. Wu and W. Li, *Chin. Chem. Lett.*, 2020, **31**, 865-868.
79. M. Privado, H. Dahiya, P. de la Cruz, M. L. Keshtov, F. Langa and G. D. Sharma, *J. Mater. Chem. C*, 2021, **9**, 16272-16281.
80. J. Huang, R. Peng, L. Xie, W. Song, L. Hong, S. Chen, Q. Wei and Z. Ge, *J. Mater. Chem. A*, 2019, **7**, 2646-2652.
81. Y. Sun, B. Guo, Y. Chen, W. Zhang, X. Li, G. Yu and F. Li, *New J. Chem.*, 2018, **42**, 5314-5322.
82. C.-P. Chen, Y.-C. Li, Y.-Y. Tsai and Y.-W. Lu, *Sol. Energy Mater. Sol. Cells*, 2018, **183**, 120-128.
83. R. Z. Liang, Y. Zhang, V. Savikhin, M. Babics, Z. Kan, M. Wohlfahrt, N. Wehbe, S. Liu, T. Duan, M. F. Toney, F. Laquai and P. M. Beaujuge, *Adv. Energy Mater.*, 2018, **9**,1802836.
84. Y. Xie, L. Huo, B. Fan, H. Fu, Y. Cai, L. Zhang, Z. Li, Y. Wang, W. Ma, Y. Chen and Y. Sun, *Adv. Funct. Mater.*, 2018, **28**,1800627.
85. H.-X. Qi, B.-H. Yu, S. Liu, M. Zhang, X.-L. Ma, J. Wang and F.-J. Zhang, *Chin. Phys. B*, 2018, **27**.
86. M. N. Shah, M. F. Shah, J. Ma, M. I. Shah, Y. Yang and X. Pan, *J. Mater. Sci.*, 2020, **56**, 2528-2538.
87. M. M. Stylianakis, D. M. Kosmidis, K. Anagnostou, C. Polyzoidis, M. Krassas, G. Kenanakis, G. Viskadourous, N. Kornilios, K. Petridis and E. Kymakis, *Nanomaterials (Basel)*, 2020, **10**,89.
88. W. Li, J. Cai, F. Cai, Y. Yan, H. Yi, R. S. Gurney, D. Liu, A. Iraqi and T. Wang, *Nano Energy*, 2018, **44**, 155-163.
89. H. Feng, X. Song, Z. Zhang, R. Geng, J. Yu, L. Yang, D. Baran and W. Tang, *Adv. Funct. Mater.*, 2019, **29**,1903269.
90. C.-P. Chen, Y.-Y. Tsai, Y.-C. Chen and Y.-H. Li, *Sol. Energy*, 2018, **176**, 170-177.
